# Supplementary material
Source: PubMed Central journal article supplement (PMC4311209)
Supplement: supp_tpc.114.132928_tpc132928_Supplemental.pdf [file supp_tpc.114.132928_tpc132928_Supplemental.pdf]

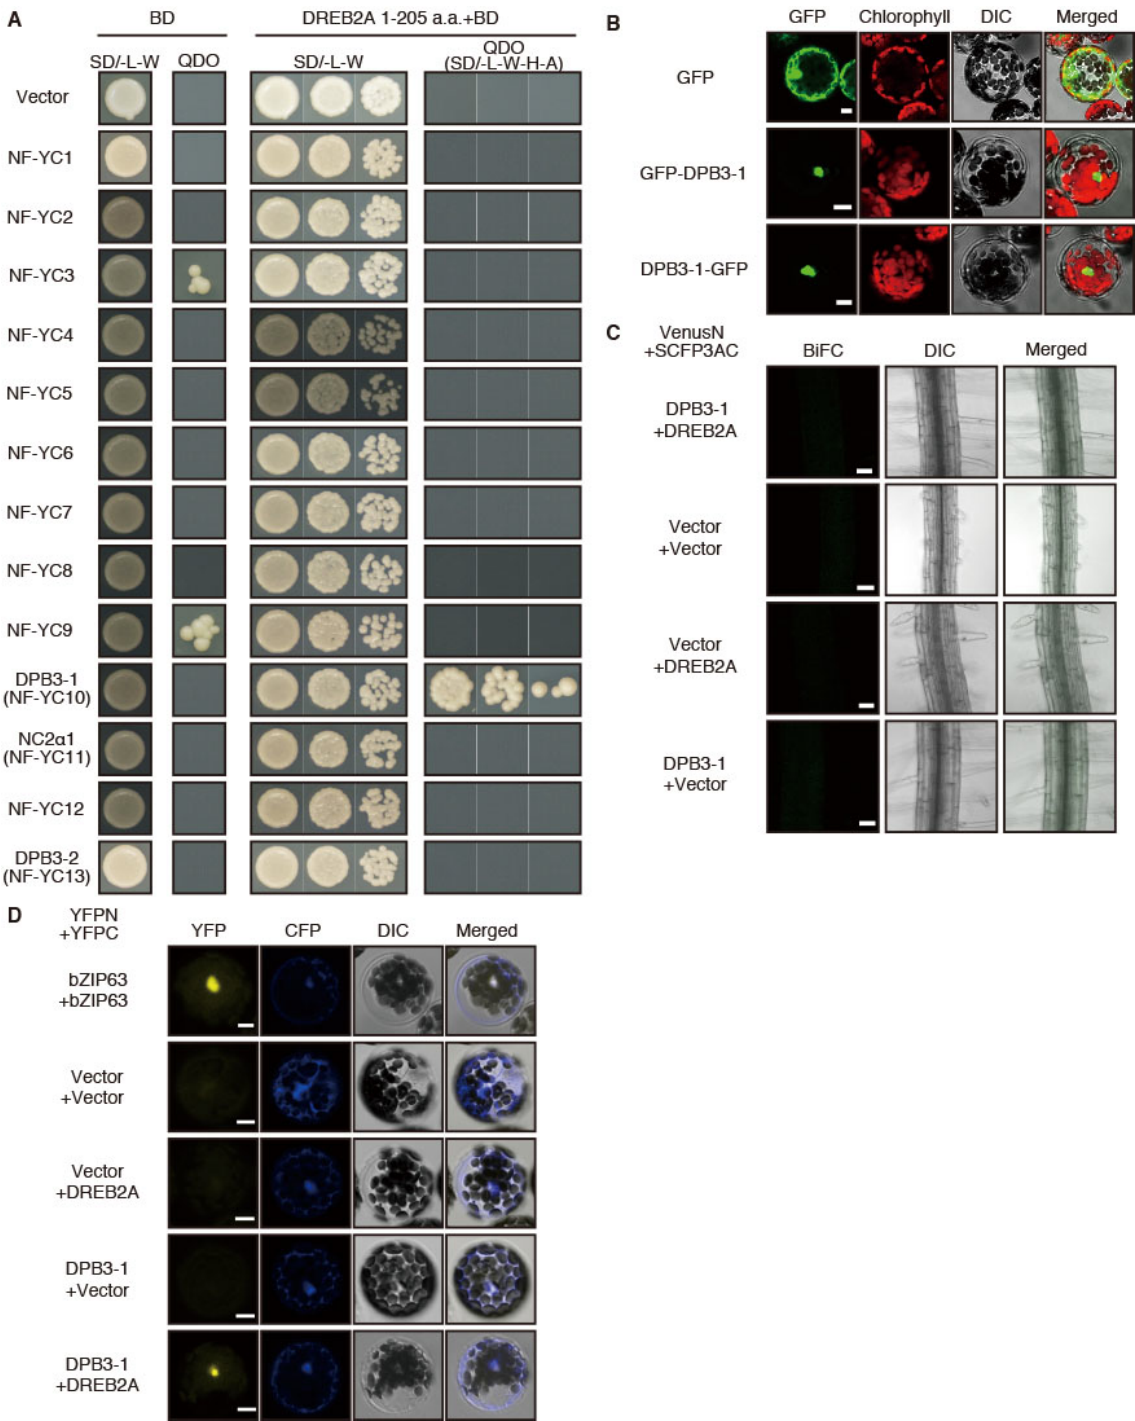

**Supplemental Figure 1.** Analysis of the Interactions between DREB2A and H2A-Like Proteins, and Verification of the DREB2A-DPB3-1 Interaction by the BiFC System in Transgenic *Arabidopsis* under the Control Condition or in Mesophyll Protoplasts.

**(A)** The growth of yeast cells harboring H2A-like proteins fused to the GAL4 activation domain (AD) on the non-selective medium SD/-L-W or the selective medium SD-L-W-H-Ade (QDO) was tested. The DREB2A fragment was expressed as a fusion protein with the GAL4 DNA-binding domain (BD).

**(B)** Nuclear localization of DPB3-1 fused to the N- or C-terminal end of sGFP in *Arabidopsis*

**Supplemental Figure 1 (continued).**

mesophyll protoplasts. The construct that expressed each fusion protein was transfected into *Arabidopsis* mesophyll protoplasts. Differential interference contrast (DIC) images, confocal images of GFP, confocal images of chlorophyll fluorescence, and merged images are shown. Scale bars represent 10  $\mu\text{m}$ .

**(C)** *In vivo* DREB2A-DPB3-1 interaction in transgenic plants under the non-stress condition. The roots of the transgenic plants used in Figure 1E were observed under the non-stress condition. Confocal images of BiFC fluorescence (left), DIC images (middle), and merged images (right) are shown. Scale bars represent 50  $\mu\text{m}$ .

**(D)** Verification of the DREB2A-DPB3-1 interaction by the BiFC system in *Arabidopsis* mesophyll protoplasts. Two constructs that expressed a fusion protein of DREB2A and the C-terminal half of YFP (YFP<sup>C</sup>-DREB2A) or a fusion protein of DPB3-1 and the N-terminal half of YFP (YFP<sup>N</sup>-DPB3-1) were transfected into *Arabidopsis* mesophyll protoplasts under the control of the 35S promoter. The empty vectors in combination with each fusion construct were also transfected. A construct that expressed CFP under the control of the 35S promoter was co-transfected to indicate transfected protoplasts. The transcription factor bZIP63, which forms a dimer, was used as a positive control (Walter et al., 2004). The transfected protoplasts were treated with 25  $\mu\text{M}$  MG132 for 2 h in the dark. DIC images, confocal images of YFP and CFP fluorescence, and merged images are shown. Scale bars represent 10  $\mu\text{m}$ .

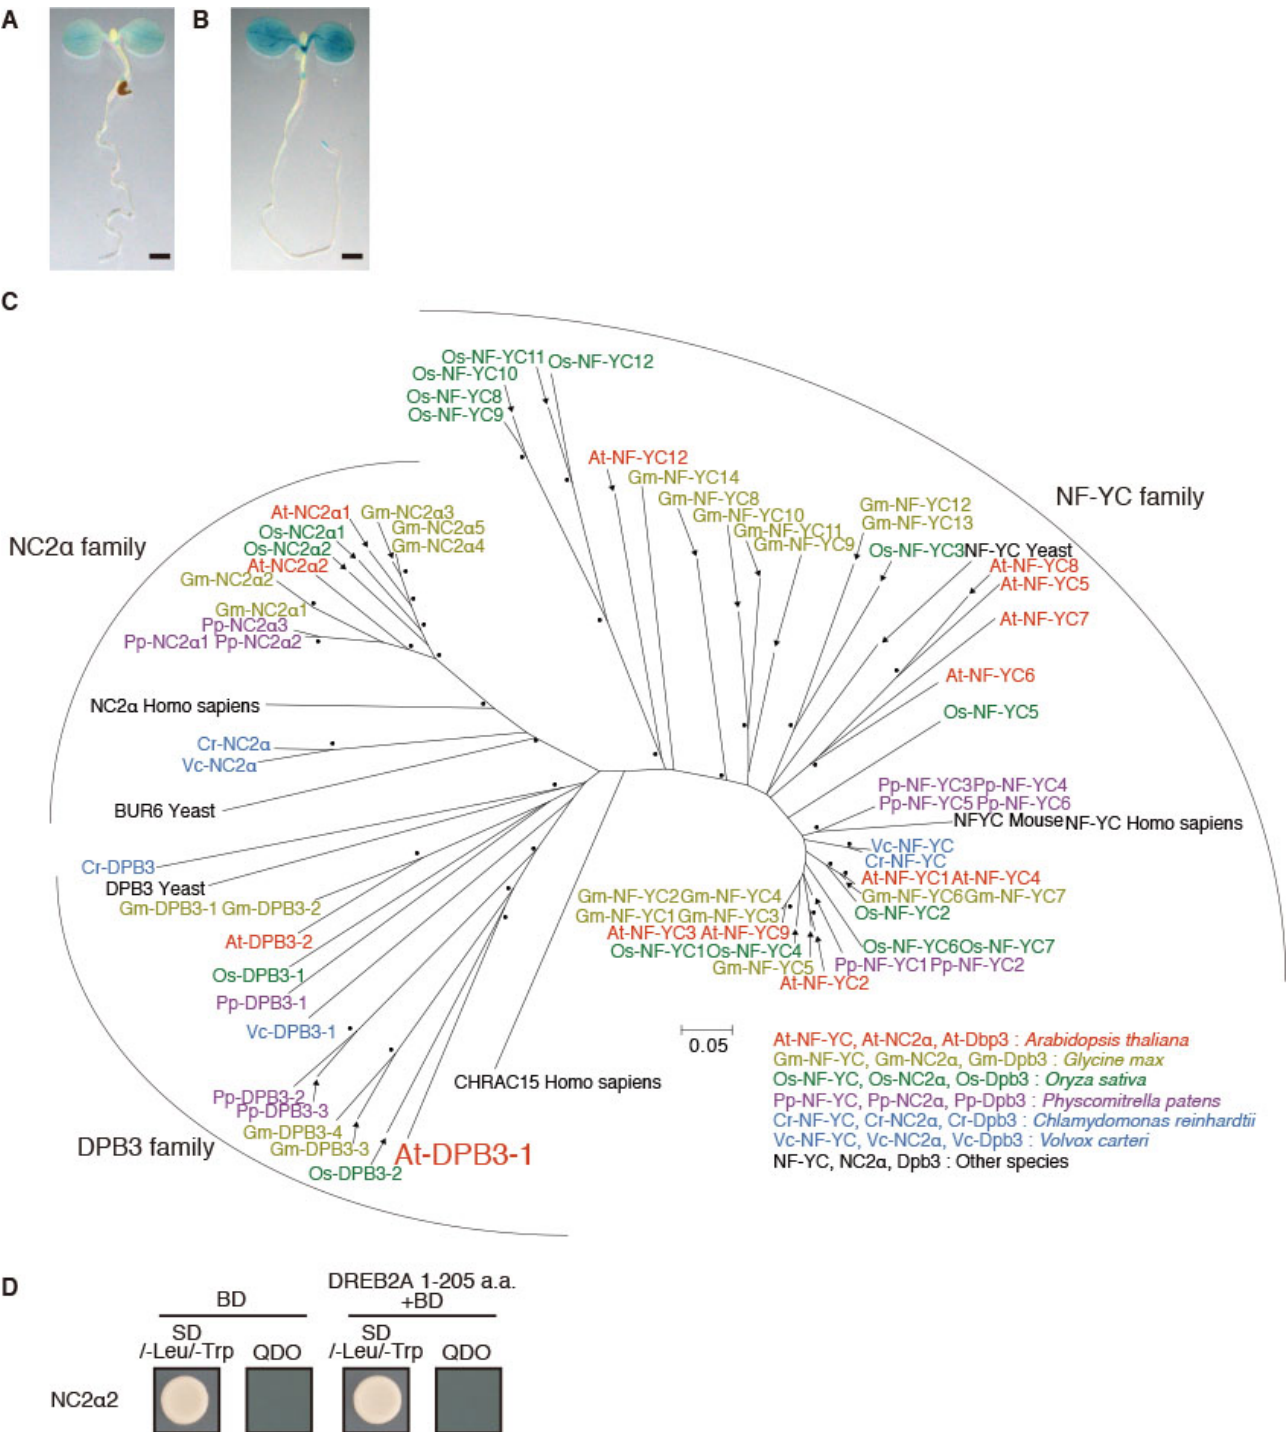

**Supplemental Figure 2.** Expression Patterns of *DPB3-1* and a Phylogenetic Tree of the H2A-Like HFD-Containing Proteins.

**(A)** and **(B)** GUS staining of seven-day-old *DPB3-1pro:GUS* transgenic plants under the control condition **(A)** and the heat stress condition (37°C, 5 h) **(B)**. Scale bars represent 1 mm.

**(C)** Phylogenetic tree of H2A-like HFD-containing proteins based on amino acids sequences of the conserved domain. The peptide sequences of the H2A-like proteins for *Glycine max*, *Oryza sativa*, *Physcomitrella patens*, *Chlamydomonas reinhardtii* and *Volvox*

**Supplemental Figure 2 (continued).**

*carteri* were obtained from Phytozome (Phytozome v9.1, <http://www.phytozome.net/>). A consensus tree from 1000 bootstrap samplings is shown, and a dot indicates a node that was supported with a bootstrap value > 50. The scale bar indicates the substitution rate per residue.

**(D)** The growth of yeast cells harboring NC2α2 proteins fused to the GAL4 activation domain (AD) on the non-selective medium SD/-L-W or the selective medium SD-L-W-H-Ade (QDO) was tested. DREB2A was expressed as a fusion protein with the GAL4 DNA-binding domain (BD).

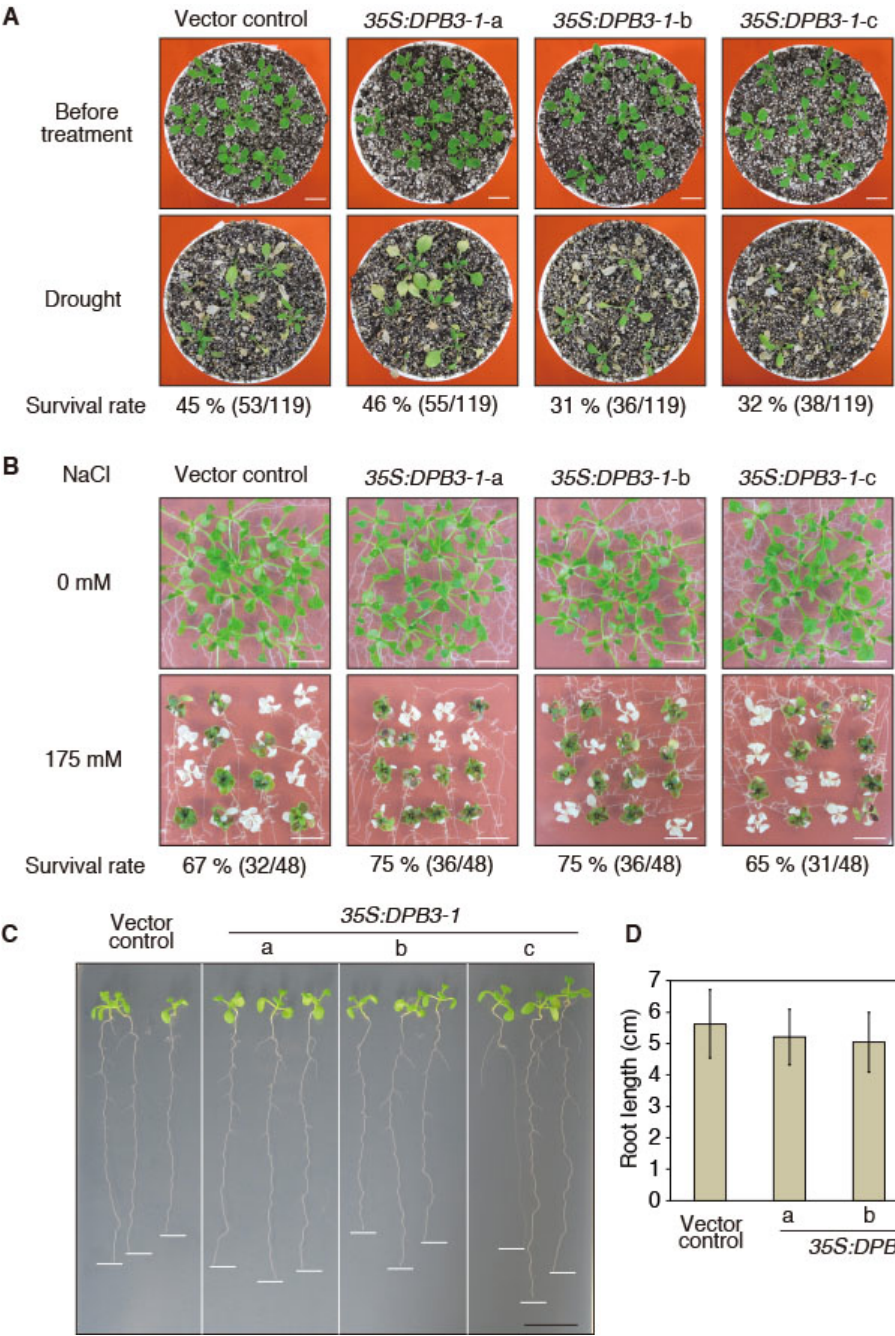

**Supplemental Figure 3.** Stress Tolerance and Root Growth of *DPB3-1*-Overexpressing *Arabidopsis*.

Drought stress tolerance of the *DPB3-1*-overexpressing plants. Seedlings were grown on agar medium for 14 days and then on soil for five days. Water was withheld for two weeks. The survival rates presented below the photographs were determined after three days of recovery in the well-watered condition. The numbers in the parentheses indicate the number of individuals that survived over the number of tested individuals. Scale bars represent 1 cm. The average survival rates were calculated using the results of six replicate experiments. More than twenty plants (seven plants/pot) were tested in each experiment. The data were evaluated using one-way ANOVA. No significant differences were detected

**Supplemental Figure 3 (continued).**

( $p > 0.05$ ).

**(B)** High salt stress tolerance of the *DPB3-1*-overexpressing plants. Seedlings were grown on solid GM for 9 days and then transferred onto 0.8% agar plates (0.5 × MS medium) supplemented with or without 175 mM NaCl. They were grown for approximately nine to ten days after the transfer at 22°C. Scale bars represent 1 cm. Average survival rates were calculated using the results of three replicate experiments. Sixteen plants were tested in each experiment. The data were evaluated using one-way ANOVA, and no significant differences were detected ( $p > 0.05$ ).

**(C)** Root growth of the *DPB3-1*-overexpressing plants under the control conditions. Seedlings were grown on solid GM for 3 days and then in square Petri dishes containing 35 mL of 1.2% solid medium (0.5 × MS medium) for an additional seven days. Photographs of 10-day-old plants are shown. The white bars indicate the positions of the root tips. The black scale bar represents 1 cm.

**(D)** Average root lengths of plants grown as in **(C)**. The error bars indicate SD ( $n = 28$ ). The data were evaluated using one-way ANOVA, and no significant differences were detected ( $p > 0.05$ ).

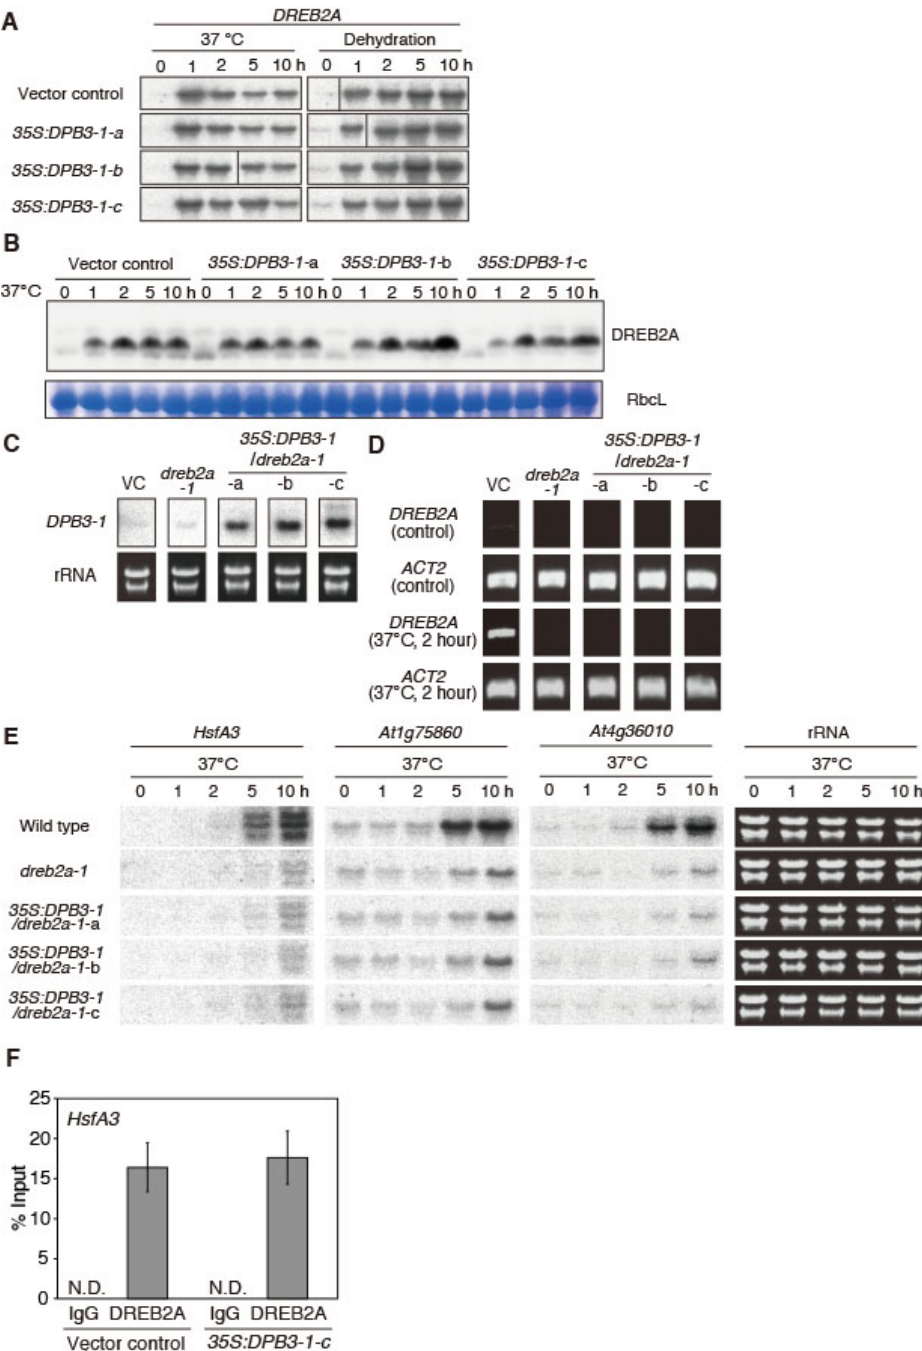

**Supplemental Figure 4.** Expression Analysis of the Heat Stress-Inducible Genes in *35S:DPB3-1/dreb2a-1* Plants, and Effect of the *DPB3-1* Subunit on the Accumulation Level or DNA-Binding Activity of *DREB2A*.

**(A)** Expression levels of *DREB2A* during heat and dehydration stress in the vector control and *35S:DPB3-1* plants. Ethidium bromide staining of rRNA bands to demonstrate equal loading is shown in the Figure 4A.

**(B)** Accumulation levels of the *DREB2A* protein in the *DPB3-1*-overexpressing plants. Total proteins extracted from the heat stress-treated plants were analyzed by immunoblotting using the *DREB2A*-specific antibody (upper panel). The rubisco large subunit (rbcL) visualized by Coomassie staining is shown as a loading control (lower panel).

**Supplemental Figure 4 (continued).**

**(C)** Expression levels of *DPB3-1* mRNA in the wild type, *dreb2a-1* mutant and three transgenic lines overexpressing *DPB3-1* in *dreb2a-1* mutant (*35S:DPB3-1/dreb2a-1*).

**(D)** RT-PCR analysis of the expression levels of *DREB2A* in the wild type, *dreb2a-1* and *35S:DPB3-1/dreb2a-1* plants under the control and heat stress conditions. *ACTIN2* was used as an internal control. The primers used for PCR are shown in Supplemental Table 5.

**(E)** Expression levels of several heat stress-inducible genes downstream of *DREB2A* during heat stress in the wild-type, *dreb2a-1* and *35S:DPB3-1/dreb2a-1* plants. Ethidium bromide staining of rRNA bands is shown to demonstrate equal loading.

**(F)** ChIP-PCR assays of the *HsfA3* promoter region were performed using the vector control and *DPB3-1*-overexpressing plants. The values represent the means from triplicate biological repeats, and the error bars indicate SD. The results show the recovery of immunoprecipitated material using the *DREB2A*-specific antibody (IP) or IgG (negative control), as a percentage of the input DNA. The data were evaluated using Student's t-test, and no significant differences were detected between the two plants ( $p > 0.05$ ).

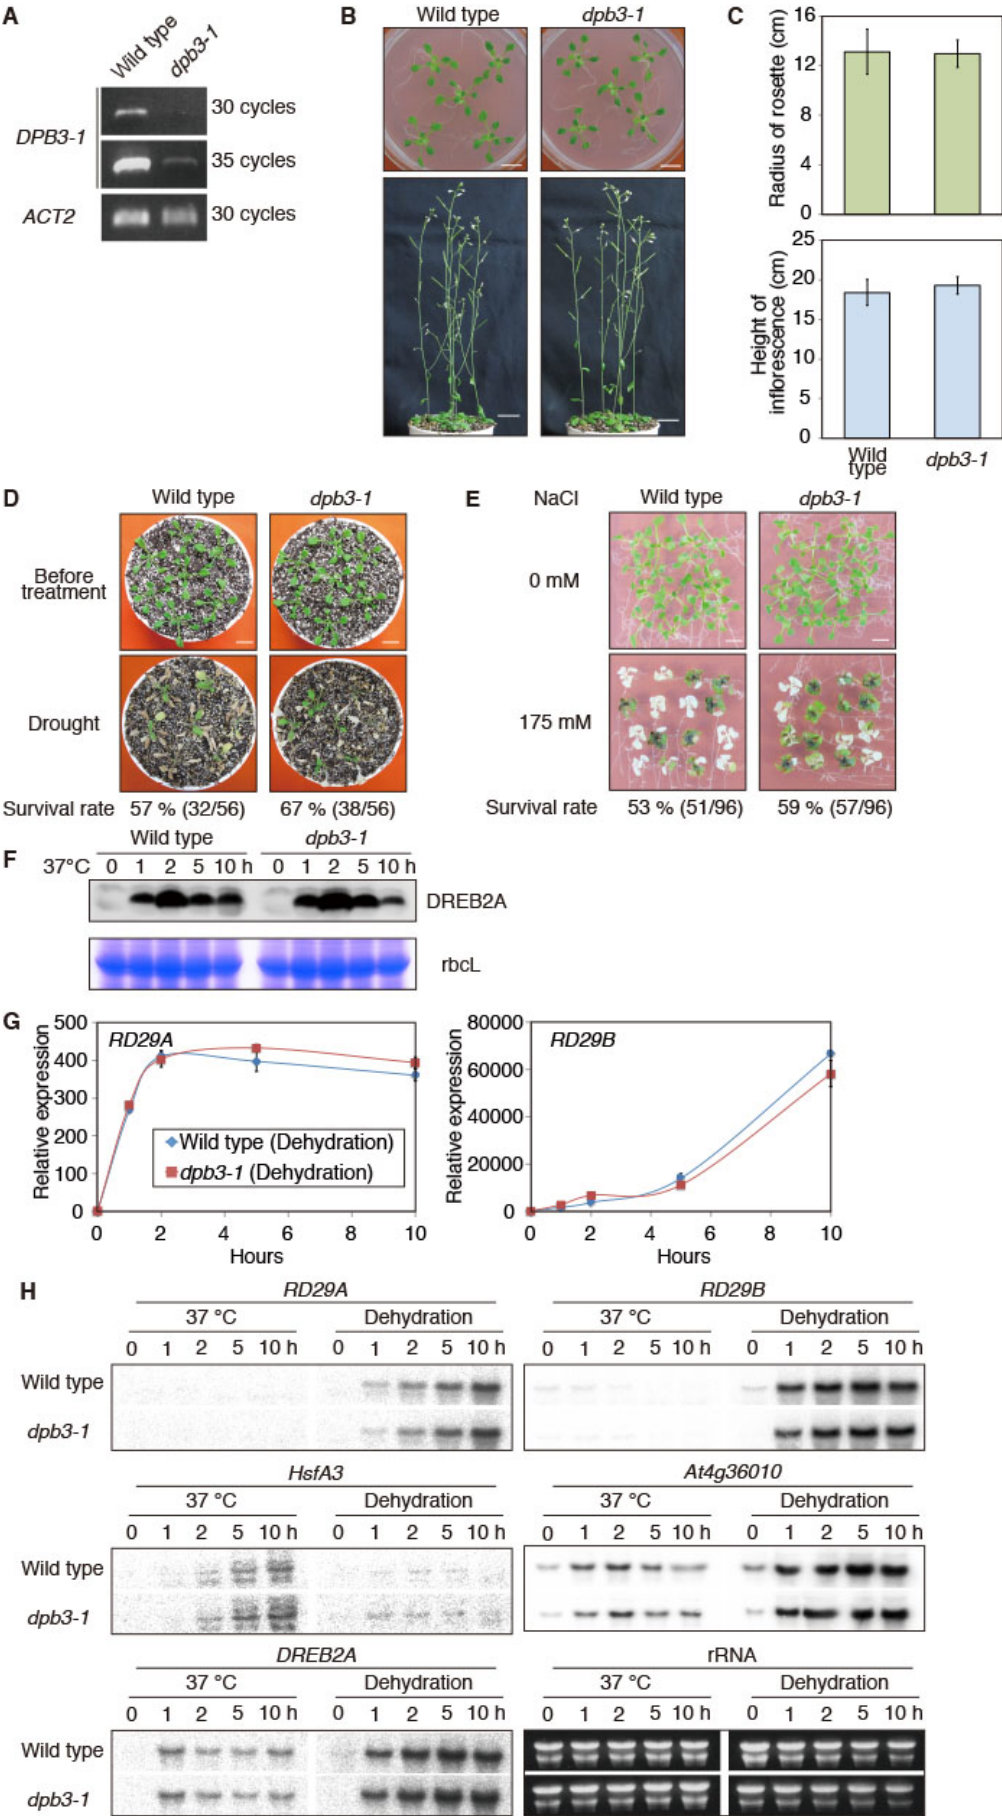

Supplemental Figure 5.

**Supplemental Figure 5 (continued).** Additional Analysis of the *dpb3-1* Mutant.

**(A)** RT-PCR analysis of the expression levels of *DPB3-1* in the wild type and the *dpb3-1* mutant. The results after 30 and 35 PCR cycles are shown. *Actin* was used as an internal control. The primers used for PCR are shown in Supplemental Table 5.

**(B)** Growth of the *dpb3-1* mutant under the control condition. The analysis was performed as described in Figure 5B. Scale bars represent 1 cm.

**(C)** Average radius of the rosette and height of the inflorescence calculated from the plants shown in **(B)**. Error bars indicate SD (n = 25). The data were evaluated using one-way ANOVA, and no significant differences were detected ( $p > 0.05$ ).

**(D)** Drought stress tolerance of the *dpb3-1* mutant. The analysis was performed as described in Supplemental Figure 5A. Scale bars represent 1 cm. The data were evaluated using one-way ANOVA, and no significant differences were detected ( $p > 0.05$ ).

**(E)** High salinity stress tolerance of the *dpb3-1* mutant. The analysis was performed as described in Figure Supplemental Figure 5B. Scale bars represent 1 cm. The data were evaluated using one-way ANOVA, and no significant differences were detected ( $p > 0.05$ ).

**(F)** Accumulation level of the DREB2A protein in the *dpb3-1* mutant. The analysis was performed as described in Supplemental Figure 4B.

**(G)** Quantitative RT-PCR analysis of the expression levels of two dehydration-inducible genes during dehydration stress in the *dpb3-1* mutant. The expression level of each gene in the wild-type plant under the control condition was defined as 1.0. The values represent means from triplicate measurements, and the error bars indicate SD. The data at each time point were evaluated using one-way ANOVA, and no significant differences were detected ( $p > 0.05$ ).

**(H)** Expression levels of several genes downstream of DREB2A and the *DREB2A* gene during dehydration or heat stress in 14-day-old wild-type and *dpb3-1* mutant plants. Ethidium bromide staining of rRNA bands is shown to demonstrate equal loading.

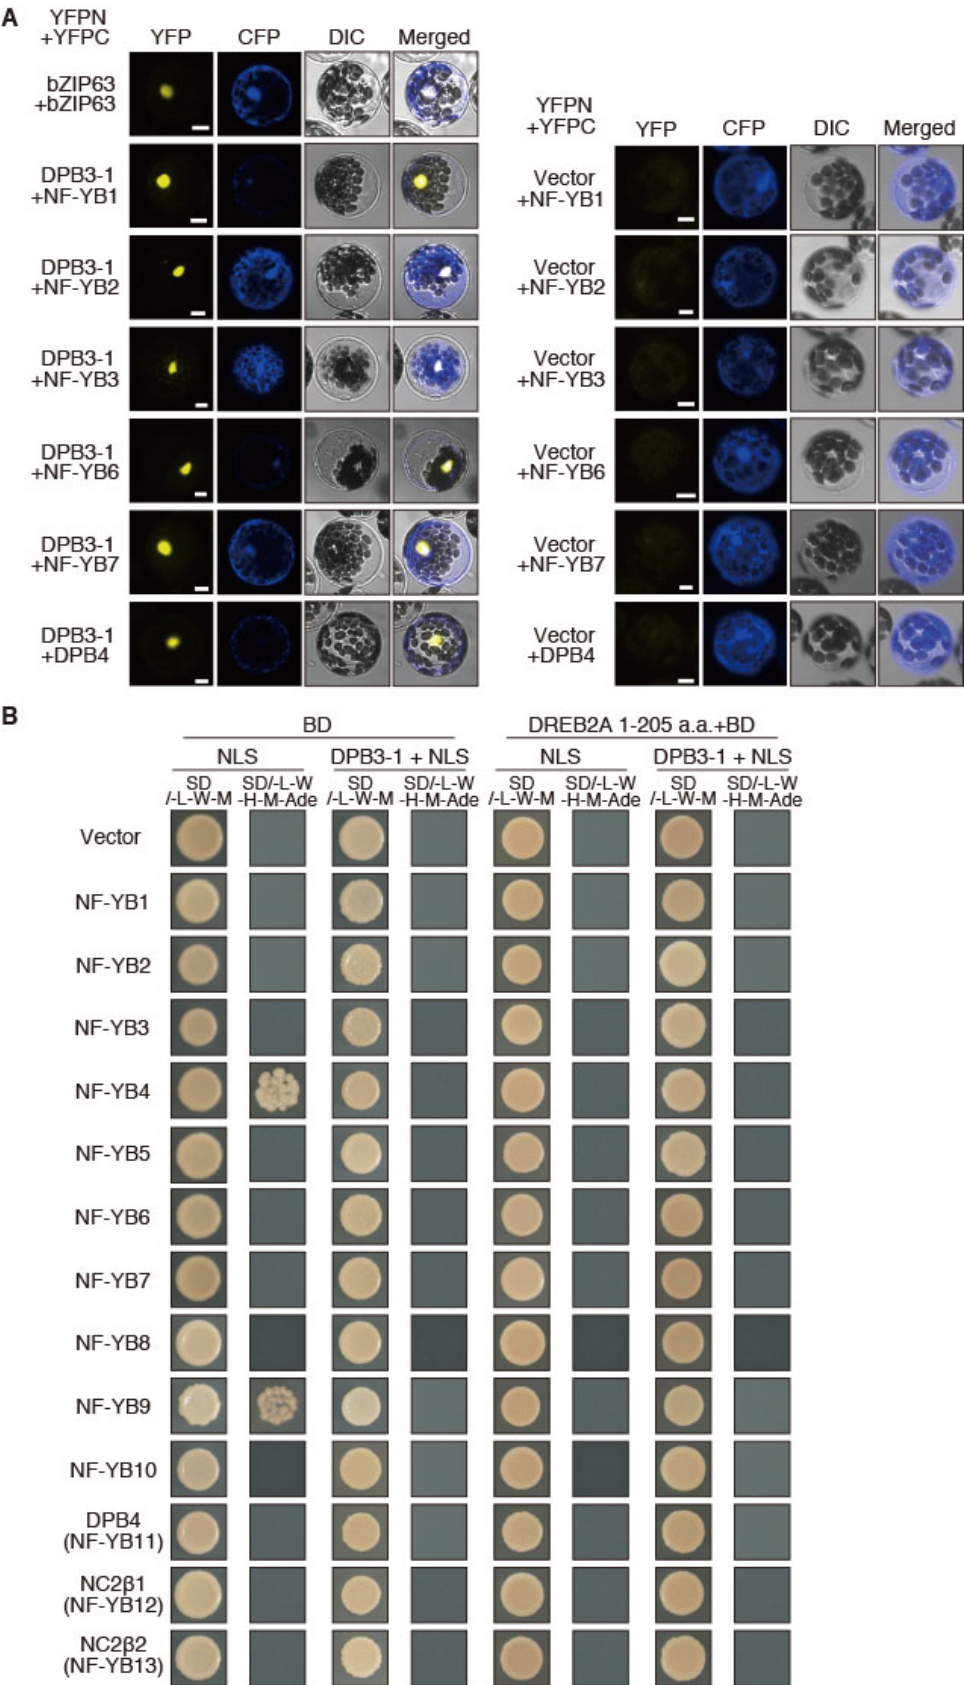

Supplemental Figure 6.

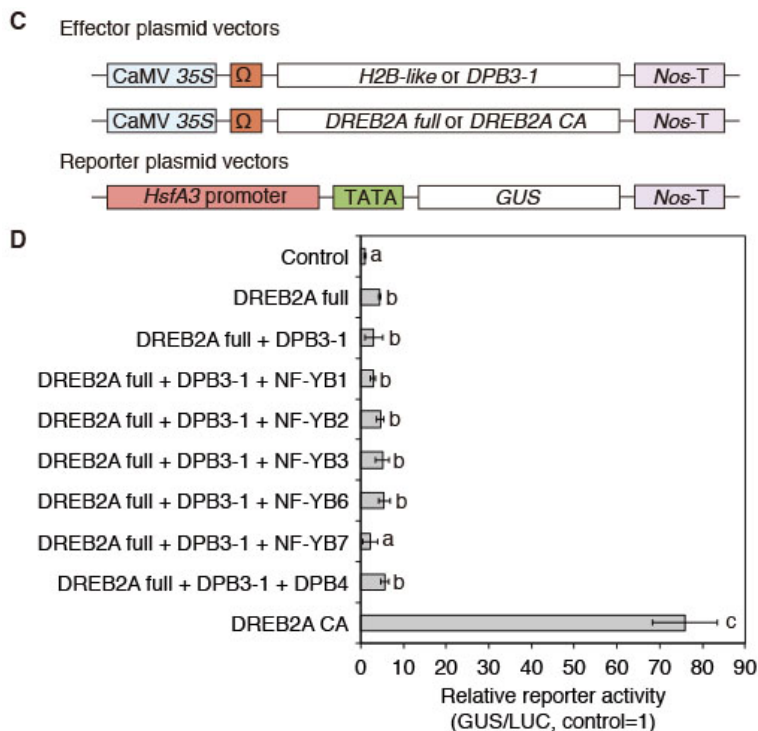

**Supplemental Figure 6 (continued).** Confirmation of the Interaction between DPB3-1 and H2B-Like Proteins in Protoplasts, and Analysis of the Interaction between DREB2A and Dimers Composed of DPB3-1 and H2B-Like Proteins, and Effect of the Dimers on the Transcriptional Activity of DREB2A.

**(A)** Verification of the interaction between DPB3-1 and H2B-like proteins using the BiFC system in *Arabidopsis* mesophyll protoplasts. Two constructs that expressed a fusion protein of DPB3-1 and the N-terminal half of YFP (YFP<sup>N</sup>-DPB3-1) or a fusion protein of six H2B-like proteins and the C-terminal half of YFP (YFP<sup>C</sup>-DPB3-1) under the control of the 35S promoter were transfected into *Arabidopsis* mesophyll protoplasts. The empty vectors were also transfected in combination with each fusion construct. A construct that expressed CFP under the control of the 35S promoter was co-transfected to indicate transfection of the protoplasts. The transcription factor bZIP63, which forms a dimer, was used as a positive control (Walter et al., 2004). DIC images, confocal images of YFP and CFP fluorescence, and merged images are shown. Scale bars represent 10  $\mu$ m.

**(B)** The growth of yeast cells harboring H2B-like proteins fused to the GAL4 activation domain (AD), the N-terminal region of DREB2A fused to the GAL4 DNA-binding domain (BD), and DPB3-1 fused to a nuclear localization signal (NLS) on selective medium (SD/-L-W-H-M-Ade) or nonselective medium (SD/-L-W-M).

**(C)** Schematic diagram of the effector and reporter constructs for the transactivation experiment. The *HsfA3* 1-kb promoter:*GUS* fusion gene was used as the reporter. The plasmids containing the *CaMV* 35S promoter and the tobacco mosaic virus  $\Omega$  sequence fused to the coding sequence of H2B-like proteins, DPB3-1, full-length DREB2A or

**Supplemental Figure 6 (continued).**

DREB2A CA were cotransfected into protoplasts. *Nos-T* indicates the terminator sequence of the gene for nopaline synthetase.

**(D)** Transactivation of the *HsfA3* 1-kb promoter:*GUS* reporter gene by full-length DREB2A and various dimers of a H2B-like protein and DPB3-1. Values indicate means from assays performed in triplicate, and the bars indicate the SD. The letters next to the bars indicate significant differences between the construct combinations ( $p < 0.05$  according to Tukey's multiple range test). The *35S:LUC* plasmid was also cotransfected in each experiment as an internal control.

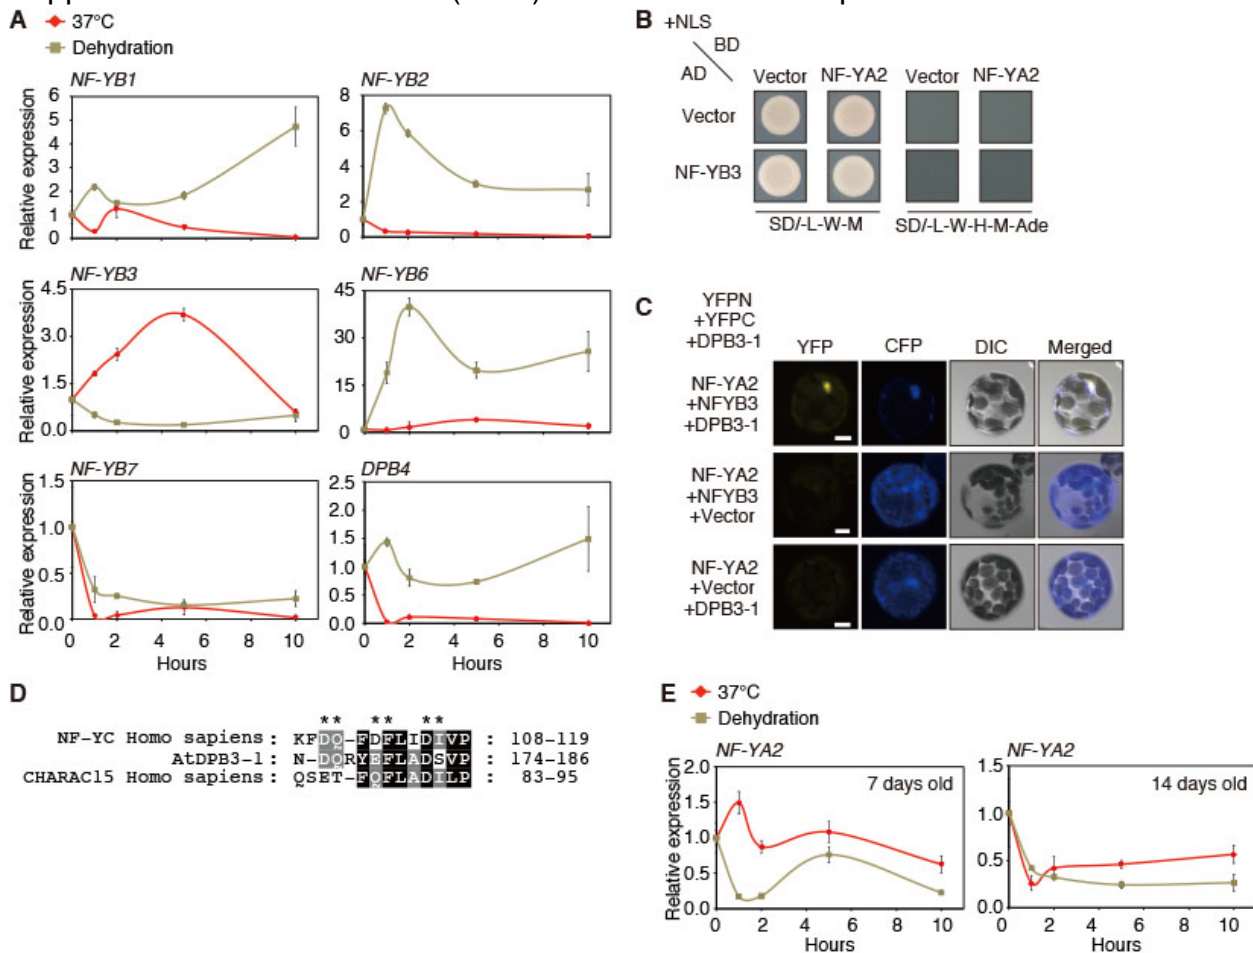

**Supplemental Figure 7.** Expression Analysis of *NF-YA2* and *H2B-like* Genes under Stress Conditions in 7-day-old Plants, and Interaction among *NF-YA2*, *NF-YB3* and *DPB3-1*.

**(A)** Quantitative RT-PCR analysis of the expression levels of the *H2B-like* genes during heat and dehydration stress in 7-day-old plants. The expression level of each gene under the control condition was defined as 1.0. The error bars indicate SD (n = 3).

**(B)** The growth of yeast cells harboring *NF-YB3* fused to the GAL4 activation domain (AD) and *NF-YA2* fused to the GAL4 DNA-binding domain (BD) on selective medium (SD/-L-W-H-M-Ade) or nonselective medium (SD/-L-W-M).

**(C)** Verification of the interaction among *NF-YA2*, *NF-YB3* and *DPB3-1* using the BiFC system in *Arabidopsis* mesophyll protoplasts. Three constructs that expressed (1) a fusion protein of *NF-YA2* and the N-terminal half of YFP (YFP<sup>N</sup>-*NF-YA2*), (2) a fusion protein of *NF-YB3* and the C-terminal half of YFP (YFP<sup>C</sup>-*NF-YB3*), and (3) *DPB3-1* under the control of the *35S* promoter were transfected into *Arabidopsis* mesophyll protoplasts. Corresponding empty vectors were transfected for the control experiments. A construct that expressed CFP under the control of the *35S* promoter was co-transfected to indicate transfection of the protoplasts. DIC images, confocal images of YFP and CFP fluorescence, and merged images are shown. The YFP signal indicates that *DPB3-1* expression is

**Supplemental Figure 7 (continued).**

necessary for the interaction between NF-YA2 and NF-YB3. Scale bars represent 10  $\mu$ m.

**(D)** Alignment of the conserved amino acid sequences in H2A-like HFD-containing proteins. The sequences of the conserved regions in the H2A-like proteins are shown. Asterisks indicate residues involved in the trimerization of NF-Y. The CHRAC15 protein in humans is a homolog of the corresponding protein in *Arabidopsis*, DPB3-1. Numbers on the right side correspond to the actual amino acid sequence numbers of each protein.

**(E)** Quantitative RT-PCR analysis of the expression levels of the NF-YA2 genes during heat and dehydration stress in 7-day-old and 14-day-old plants. The expression level of each gene under the control condition was defined as 1.0. The error bars indicate SD (n = 3).

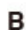

**(A)** Phylogenetic tree of NF-YA family proteins based on amino acids sequences of the conserved domain. The peptide sequences of the NF-YA family proteins from *Oryza sativa*, *Physcomitrella patens*, *Coccomyxa subellipsoidea* and *Micromonas pusilla* were obtained from Phytozome (Phytozome v9.1, <http://www.phytozome.net/>). A consensus tree from 1000 bootstrap samplings is shown, and a dot indicates a node that was supported with a bootstrap value > 50. The scale bar indicates the substitution rate per residue.

16

**Supplemental Figure 8 (continued).**

obtained from Phytozome (Phytozome v9.1, <http://www.phytozome.net/>). A consensus tree from 1000 bootstrap samplings is shown, and a dot indicates a node that was supported with a bootstrap value > 50. The scale bar indicates the substitution rate per residue.

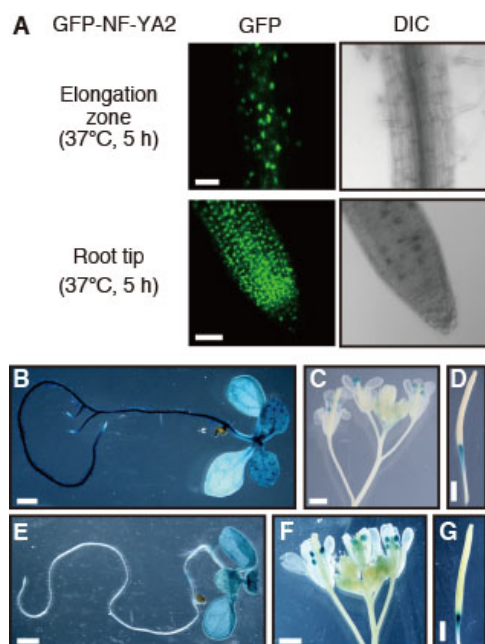

**Supplemental Figure 9.** Subcellular Localization of NF-YA2 under Heat Stress Conditions, and Additional Analysis of the Tissue-Specific Expression Patterns of *NF-YA2* and *NF-YB3*.

**(A)** Nuclear localization of sGFP-NF-YA2 under heat stress conditions. The root tissues of *35S:sGFP-NF-YA2* plants were observed under a microscope after 5 hours of heat stress. Confocal images of GFP fluorescence and differential interference contrast (DIC) images are shown. Scale bars represent 100 μm.

**(B) to (G)** GUS staining of *NF-YA2*<sub>pro</sub>:*GUS* transgenic plants (**[B]** to **[D]**) and *NF-YB3*<sub>pro</sub>:*GUS* transgenic plants (**[E]** to **[G]**) at different growth stages. Whole seedlings of 10-day-old (**[B]** and **[E]**) plants and flowers (**[C]** and **[F]**) and siliques (**[D]** and **[G]**) from seven-week-old plants are shown. Scale bars represent 1 mm.

**A** *HsfA3* 1-kb promoter

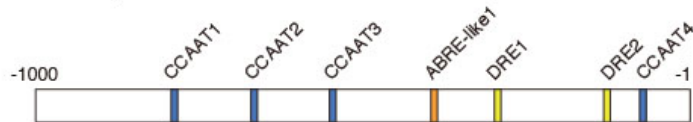

**B** DPB3-1+NLS

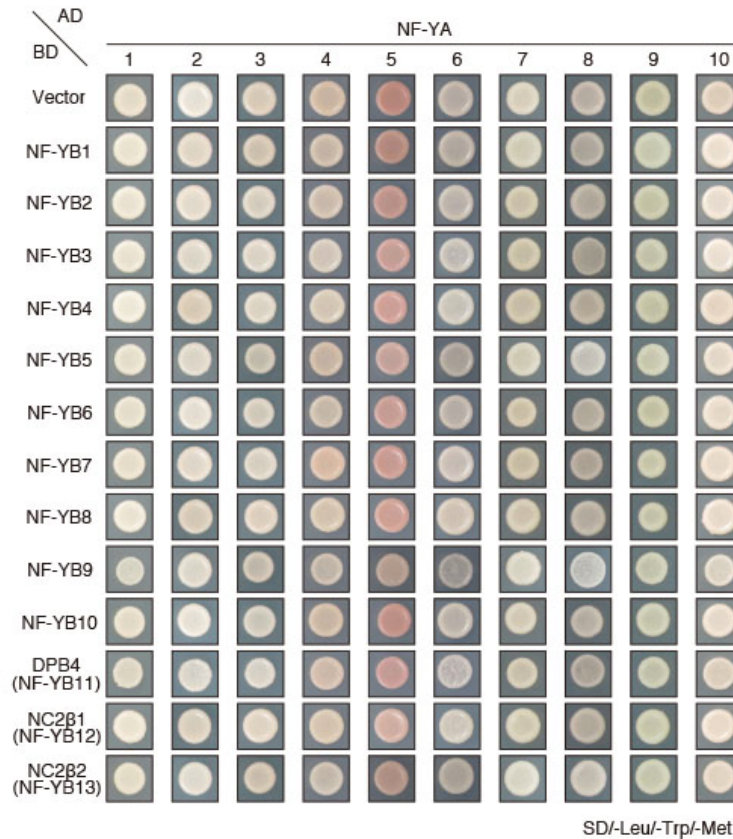

**C** *RD29A* 1-kb promoter

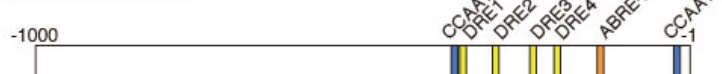

**D**

Effector plasmid vectors

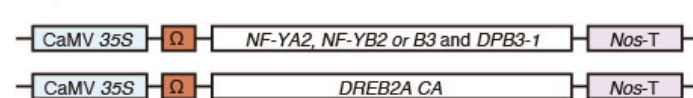

Reporter plasmid vectors

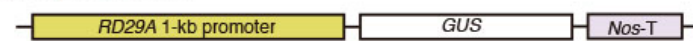

**E**

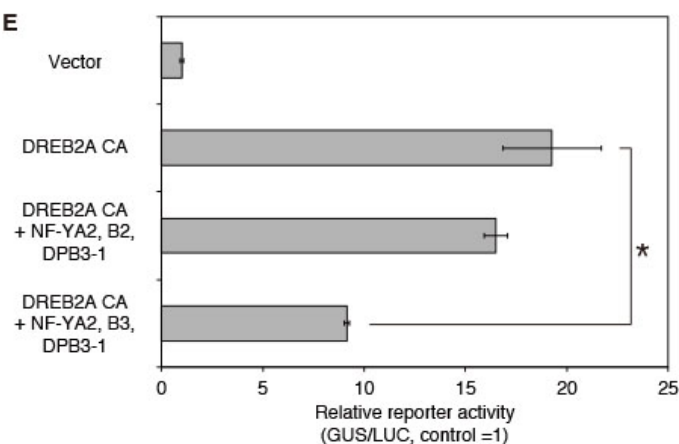

**Supplemental Figure 10.**

Schematic Diagram of the *HsfA3* 1-kb and *RD29A* 1-kb Promoter, and Promoter-Specific Effect of the Trimer Composed of NF-YA2, NF-YB3 and DPB3-1, and Yeast Three-Hybrid Assay on Nonselective Medium.

**(A)** Schematic diagram of the *HsfA3* 1-kb promoter. The positions of the DREs, CCAAT boxes and ABRE-like motif on the promoter are indicated.

**(B)** Yeast three-hybrid assay to identify candidate NF-Y trimers containing DPB3-1. The growth of yeast cells harboring H2B-like proteins fused to the GAL4 DNA-binding domain (BD), NF-YA family proteins fused to the GAL4 activation domain (AD), and DPB3-1 fused to a nuclear localization signal (NLS) on nonselective medium (SD/-L-W-M) are shown.

**(C)** Schematic diagram of the *RD29A* 1-kb promoter. The positions of the DREs, CCAAT boxes and ABRE-like motif on the promoter are indicated.

**(D)** Schematic diagram of the effector and reporter constructs for the transactivation experiment. The *RD29A* 1kb-promoter:*GUS* fusion gene was used as the reporter. The plasmids containing the *CaMV 35S*

**Supplemental Figure 10 (continued).**

promoter and the tobacco mosaic virus  $\Omega$  sequence fused to *NF-Y2A*, *NF-YB3*, *DPB3-1* or *DREB2A CA* coding sequence were cotransfected into protoplasts.

**(E)** Transactivation of the *RD29A* 1-kb promoter:*GUS* reporter gene by DREB2A CA and trimer of NF-YA2, NF-YB3 and DPB3-1. The *35S:LUC* plasmid was also cotransfected in each experiment as an internal control. The asterisks (\*) indicate significantly low differences between the reporter activities ( $p < 0.05$  according to Student's t-test).

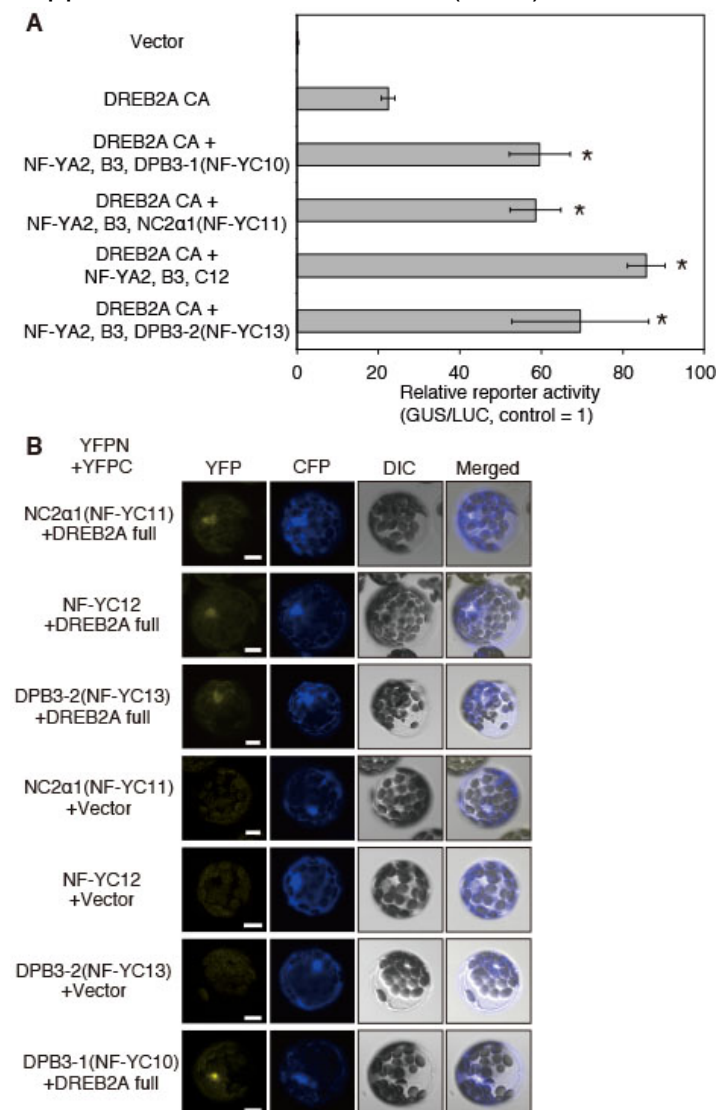

**Supplemental Figure 11.** The Effect of Other H2A-Like Proteins on the Reporter Activity with DREB2A, and Interaction between H2A-Like Proteins and DREB2A in Protoplasts.

(A) Transactivation of the *HsfA3* 1-kb promoter:*GUS* reporter gene by DREB2A CA and trimer of NF-YA2, NF-YB3 and H2A-like proteins. The *35S:LUC* plasmid was also cotransfected in each experiment as an internal control. Asterisks (\*) indicate significantly high differences between the reporter activities ( $p < 0.05$  according to a Bonferroni-corrected Student's t-test)

(B) Analysis of the interaction between DREB2A and H2A-like proteins using the BiFC system in *Arabidopsis* mesophyll protoplasts. Two constructs

that expressed a fusion protein of DREB2A and the C-terminal half of YFP (YFP<sup>C</sup>-DREB2A) or a fusion protein of H2A-like protein and the N-terminal half of YFP (YFP<sup>N</sup>-H2A-like protein) were transfected into *Arabidopsis* mesophyll protoplasts under the control of the *35S* promoter. The empty vectors were also transfected in combination with each fusion construct. A construct that expressed CFP under the control of the *35S* promoter was co-transfected to indicate transfection of the protoplasts. The transfected protoplasts were treated with 25  $\mu$ M MG132 for 2 h in the dark. The YFP<sup>C</sup>-DPB3-1(NF-YC10) protein was used as a positive control. DIC images, confocal images of YFP and CFP fluorescence, and merged images are shown. Scale bars represent 10  $\mu$ m.

**Supplemental Table 1.** Gene Names and Accession Numbers of the H2A-Like HFD-Containing Proteins.

Protein families in *Arabidopsis thaliana*, *Glycine max* (soybean), *Oryza sativa* (rice), *Physcomitrella patens*, *Chlamydomonas reinhardtii* and *Volvox carteri* were identified on the basis of the amino acid sequences of the conserved domain (Panther:10252). The proteins were numbered according to their locations in the phylogenetic tree.

| <i>Arabidopsis thaliana</i> |              |            | <i>Glycine max</i> |              | <i>Oryza sativa</i> |              |            | <i>Physcomitrella patens</i> |              | <i>Chlamydomonas reinhardtii</i> |              | <i>Volvox carteri</i> |              |
|-----------------------------|--------------|------------|--------------------|--------------|---------------------|--------------|------------|------------------------------|--------------|----------------------------------|--------------|-----------------------|--------------|
| Gene name                   | Generic name | Other name | Gene name          | Generic name | Gene name           | Generic name | Other name | Gene name                    | Generic name | Gene name                        | Generic name | Gene name             | Generic name |
| AT3G48590                   | NF-YC1       |            | Glyma10g29690      | Gm--NF-YC1   | LOC_Os02g07450      | Os-NF-YC1    | HAP5A      | Pp1s409_32V6                 | Pp-NF-YC1    | Cre12.g556400.t1.1               | Cr-NF-YC     | Vocar20009899m.g      | Vc-NF-YC     |
| AT1G56170                   | NF-YC2       |            | Glyma19g42460      | Gm--NF-YC2   | LOC_Os03g14669      | Os-NF-YC2    | HAP5C      | Pp1s51_318V6                 | Pp-NF-YC2    | Cre16.g680050.t1.1               | Cr-NC2α      | Vocar20000027m.g      | Vc-NC2α      |
| AT1G54830                   | NF-YC3       |            | Glyma20g37620      | Gm--NF-YC3   | LOC_Os04g58680      | Os-NF-YC3    | HAP5G      | Pp1s370_63V6                 | Pp-NF-YC3    | Cre03.g193900.t1.1               | Cr-DPB3      | Vocar20003435m.g      | Vc-DPB3      |
| AT5G63470                   | NF-YC4       |            | Glyma03g39910      | Gm--NF-YC4   | LOC_Os06g45640      | Os-NF-YC4    | HAP5B      | Pp1s315_9V6                  | Pp-NF-YC4    |                                  |              |                       |              |
| AT5G50490                   | NF-YC5       |            | Glyma08g17630      | Gm--NF-YC5   | LOC_Os08g10560      | Os-NF-YC5    | HAP5F      | Pp1s159_32V6                 | Pp-NF-YC5    |                                  |              |                       |              |
| AT5G50480                   | NF-YC6       |            | Glyma06g17780      | Gm--NF-YC6   | LOC_Os08g38780      | Os-NF-YC6    | HAP5D      | Pp1s158_8V6                  | Pp-NF-YC6    |                                  |              |                       |              |
| AT5G50470                   | NF-YC7       |            | Glyma04g37290      | Gm--NF-YC7   | LOC_Os09g30310      | Os-NF-YC7    | HAP5E      | Pp1s112_139V6                | Pp-NC2α1     |                                  |              |                       |              |
| AT5G27910                   | NF-YC8       |            | Glyma13g27790      | Gm--NF-YC8   | LOC_Os01g39850      | Os-NF-YC8    |            | Pp1s35_42V6                  | Pp-NC2α2     |                                  |              |                       |              |
| AT1G08970                   | NF-YC9       |            | Glyma08g15700      | Gm--NF-YC9   | LOC_Os01g01290      | Os-NF-YC9    |            | Pp1s143_36V6                 | Pp-NC2α3     |                                  |              |                       |              |
| AT1G07980                   | DPB3-1       | NF-YC10    | Glyma13g27780      | Gm--NF-YC10  | LOC_Os01g24460      | Os-NF-YC10   |            | Pp1s37_218V6                 | Pp-DPB3-1    |                                  |              |                       |              |
| AT3G12480                   | NC2α1        | NF-YC11    | Glyma13g27770      | Gm--NF-YC11  | LOC_Os10g11580      | Os-NF-YC11   |            | Pp1s329_24V6                 | Pp-DPB3-2    |                                  |              |                       |              |
| AT5G38140                   | NF-YC12      |            | Glyma13g35980      | Gm--NF-YC12  | LOC_Os05g23910      | Os-NF-YC12   |            | Pp1s149_89V6                 | Pp-DPB3-3    |                                  |              |                       |              |
| AT5G43250                   | DPB3-2       | NF-YC13    | Glyma12g34510      | Gm--NF-YC13  | LOC_Os11g34200      | Os-NC2α1     |            |                              |              |                                  |              |                       |              |

# Supplemental Data. Sato et al. (2014). Plant Cell 10.1105/tpc.114.132928

| <i>Arabidopsis thaliana</i> |              |            | <i>Glycine max</i> |              | <i>Oryza sativa</i> |              |            | <i>Physcomitrella patens</i> |              | <i>Chlamydomonas reinhardtii</i> |              | <i>Volvox carteri</i> |              |
|-----------------------------|--------------|------------|--------------------|--------------|---------------------|--------------|------------|------------------------------|--------------|----------------------------------|--------------|-----------------------|--------------|
| Gene name                   | Generic name | Other name | Gene name          | Generic name | Gene name           | Generic name | Other name | Gene name                    | Generic name | Gene name                        | Generic name | Gene name             | Generic name |
| AT5G19490                   | NC2α2        |            | Glyma02g09860      | Gm--NF-YC14  | LOC_Os05g41450      | Os-NC2α2     |            |                              |              |                                  |              |                       |              |
|                             |              |            | Glyma14g04320      | Gm--NC2α1    | LOC_Os01g08790      | Os-DPB3-1    |            |                              |              |                                  |              |                       |              |
|                             |              |            | Glyma02g44500      | Gm--NC2α2    | LOC_Os03g63530      | Os-DPB3-2    |            |                              |              |                                  |              |                       |              |
|                             |              |            | Glyma06g46850      | Gm--NC2α3    |                     |              |            |                              |              |                                  |              |                       |              |
|                             |              |            | Glyma15g36170      | Gm--NC2α4    |                     |              |            |                              |              |                                  |              |                       |              |
|                             |              |            | Glyma13g25860      | Gm--NC2α5    |                     |              |            |                              |              |                                  |              |                       |              |
|                             |              |            | Glyma18g01040      | Gm--DPB3-1   |                     |              |            |                              |              |                                  |              |                       |              |
|                             |              |            | Glyma11g37130      | Gm--DPB3-2   |                     |              |            |                              |              |                                  |              |                       |              |
|                             |              |            | Glyma12g07390      | Gm--DPB3-3   |                     |              |            |                              |              |                                  |              |                       |              |
|                             |              |            | Glyma11g20740      | Gm--DPB3-4   |                     |              |            |                              |              |                                  |              |                       |              |

Supplemental Table 2. GO analysis of the Genes Upregulated in *DPB3-1*-Overexpressing Plants under Heat Stress.

GO analysis was performed using the MAPMAN tool (<http://mapman.mpimp-golm.mpg.de/general/ora/ora.shtml>). The terms that are significantly enriched compared with all *Arabidopsis* genes are listed ( $p < 0.0001$ ). The count refers to the number of genes that are categorized into that term among the upregulated in *DPB3-1*-overexpressing plants. The background refers to the number of total *Arabidopsis* genes categorized under that term.

| BIN     | Binname                                                                    | Count | Background | p value  |
|---------|----------------------------------------------------------------------------|-------|------------|----------|
| 16.5.1  | secondary metabolism.sulfur-containing.glucosinolates                      | 3     | 59         | 9.37E-04 |
| 20.2    | stress.abiotic                                                             | 9     | 442        | 1.42E-05 |
| 20.2.1  | stress.abiotic.heat                                                        | 6     | 186        | 3.29E-05 |
| 27.3.23 | RNA.regulation of transcription.HSF,Heat-shock transcription factor family | 3     | 23         | 5.56E-05 |

**Supplemental Table 3.** Gene Names and Accession Numbers of the NF-YA Family Proteins.

Protein families in *Arabidopsis thaliana*, *Oryza sativa* (rice), *Physcomitrella patens*, *Coccomyxa subellipsoidea* and *Micromonas pusilla* were identified on the basis of the amino acid sequences of the conserved domain (Pfam:02045). The proteins were numbered according to their locations in the phylogenetic tree.

| <i>Arabidopsis thaliana</i> |              | <i>Oryza sativa</i> |              |            | <i>Physcomitrella patens</i> |              | <i>Coccomyxa subellipsoidea</i> C-169 |              | <i>Micromonas pusilla</i> CCMP1545 |              |
|-----------------------------|--------------|---------------------|--------------|------------|------------------------------|--------------|---------------------------------------|--------------|------------------------------------|--------------|
| Gene name                   | Generic name | Gene name           | Generic name | Other name | Gene name                    | Generic name | Gene name                             | Generic name | Gene name                          | Generic name |
| AT5G12840                   | NF-YA1       | LOC_Os03g07880      | Os-NF-YA1    | HAP2C      | Pp1s42 174V6                 | Pp-NF-YA1    | 60947                                 | Cs-NF-YA1    | 195698                             | Mp-NF-YA1    |
| AT3G05690                   | NF-YA2       | LOC_Os03g29760      | Os-NF-YA2    | HAP2E      | Pp1s31 299V6                 | Pp-NF-YA2    |                                       |              | 106430                             | Mp-NF-YA2    |
| AT1G72830                   | NF-YA3       | LOC_Os03g44540      | Os-NF-YA3    | HAP2H      |                              |              |                                       |              |                                    |              |
| AT2G34720                   | NF-YA4       | LOC_Os03g48970      | Os-NF-YA4    | HAP2D      |                              |              |                                       |              |                                    |              |
| AT1G54160                   | NF-YA5       | LOC_Os07g06470      | Os-NF-YA5    | HAP2J      |                              |              |                                       |              |                                    |              |
| AT3G14020                   | NF-YA6       | LOC_Os07g41720      | Os-NF-YA6    | HAP2G      |                              |              |                                       |              |                                    |              |
| AT1G30500                   | NF-YA7       | LOC_Os08g09690      | Os-NF-YA7    | HAP2A      |                              |              |                                       |              |                                    |              |
| AT1G17590                   | NF-YA8       | LOC_Os10g25850      | Os-NF-YA8    | HAP2I      |                              |              |                                       |              |                                    |              |
| AT3G20910                   | NF-YA9       | LOC_Os12g41880      | Os-NF-YA9    | HAP2B      |                              |              |                                       |              |                                    |              |
| AT5G06510                   | NF-YA10      | LOC_Os12g42400      | Os-NF-YA10   | HAP2F      |                              |              |                                       |              |                                    |              |
|                             |              | LOC_Os02g53620      | Os-NF-YA11   |            |                              |              |                                       |              |                                    |              |

**Supplemental Table 4.** Gene Names and Accession Numbers of the H2B-Like HFD-Containing Family Proteins.

Protein families in *Arabidopsis thaliana*, *Oryza sativa* (rice), *Physcomitrella patens*, *Chlamydomonas reinhardtii* and *Volvox carteri* were identified on the basis of the amino acid sequences of the conserved domain (Panther:11064). The proteins were numbered according to their locations in the phylogenetic tree.

| <i>Arabidopsis thaliana</i> |               |            | <i>Oryza sativa</i> |                |            | <i>Physcomitrella patens</i> |                  | <i>Chlamydomonas reinhardtii</i> |                | <i>Volvox carteri</i> |                |
|-----------------------------|---------------|------------|---------------------|----------------|------------|------------------------------|------------------|----------------------------------|----------------|-----------------------|----------------|
| Gene name                   | Generic name  | Other name | Gene name           | Generic name   | Other name | Gene name                    | Generic name     | Gene name                        | Generic name   | Gene name             | Generic name   |
| AT2G38880                   | NF-YB1        |            | LOC_Os02g49410      | Os-NF-YB1      | HAP3K      | Pp1s302_35V6                 | Pp-NF-YB1        | Cre02.g079200.t1.2               | Cr-NF-YB       | Vocar20010774m.g      | Vc-NF-YB       |
| AT2G47810                   | NF-YB2        |            | LOC_Os01g61810      | Os-NF-YB2      | HAP3A      | Pp1s83_179V6                 | Pp-NF-YB2        | Cre17.g739450.t1.3               | Cr-NC2 $\beta$ | Vocar20003887m.g      | Vc-NC2 $\beta$ |
| AT1G09030                   | NF-YB3        |            | LOC_Os05g38820      | Os-NF-YB3      | HAP3B      | Pp1s462_7V6                  | Pp-NF-YB3        | Cre07.g341800.t1.2               | Cr-DPB4        | Vocar20006871m.g      | Vc-DPB4        |
| AT2G37060                   | NF-YB4        |            | LOC_Os05g49780      | Os-NF-YB4      | HAP3C      | Pp1s25_10V6                  | Pp-NF-YB4        |                                  |                |                       |                |
| AT2G13570                   | NF-YB5        |            | LOC_Os01g70880      | Os-NF-YB5      | HAP3J      | Pp1s25_89V6                  | Pp-NF-YB5        |                                  |                |                       |                |
| AT3G53340                   | NF-YB6        |            | LOC_Os01g70890      | Os-NF-YB6      | HAP3G      | Pp1s148_126V6                | Pp-NF-YB6        |                                  |                |                       |                |
| AT5G47670                   | NF-YB7        |            | LOC_Os02g49370      | Os-NF-YB7      | HAP3E      | Pp1s181_25V6                 | Pp-NC2 $\beta$ 1 |                                  |                |                       |                |
| AT5G47640                   | NF-YB8        |            | LOC_Os03g29970      | Os-NF-YB8      | HAP3I      | Pp1s288_38V6                 | Pp-NC2 $\beta$ 2 |                                  |                |                       |                |
| AT1G21970                   | NF-YB9        |            | LOC_Os06g17480      | Os-NF-YB9      | HAP3D      | Pp1s217_34V6                 | Pp-DPB4          |                                  |                |                       |                |
| AT4G14540                   | NF-YB10       |            | LOC_Os07g41580      | Os-NF-YB10     | HAP3F      |                              |                  |                                  |                |                       |                |
| AT5G23090                   | DPB4          | NF-YB11    | LOC_Os08g07740      | Os-NF-YB11     | HAP3H      |                              |                  |                                  |                |                       |                |
| AT5G08190                   | NC2 $\beta$ 1 | NF-YB12    | LOC_Os08g29500      | Os-NC2 $\beta$ |            |                              |                  |                                  |                |                       |                |
| AT2G27470                   | NC2 $\beta$ 2 | NF-YB13    | LOC_Os09g39490      | Os-DPB4        |            |                              |                  |                                  |                |                       |                |

**Supplemental Table 5.** Sequences of the Primers Used in This Study.

| Target gene                                              | LocusID   | Oligonucleotide name | Sequence (5' to 3')                     |
|----------------------------------------------------------|-----------|----------------------|-----------------------------------------|
| Primers used for cloning of coding or promoter sequences |           |                      |                                         |
| <i>DPB3-1</i>                                            | At1g07980 | NFYC10_F_XbaI        | GCTCTAGAGATGGTGTCTGTCAAAGAA             |
|                                                          |           | NFYC10_R_XhoI        | ATCTCGAGTCAGCCTGCATCTGTCAT              |
|                                                          |           | NFYC10_F_XbaI_2      | CGTCTAGAATGGTGTCTGTCAAAGAA              |
|                                                          |           | NFYC10_R_XhoI_2      | ATCTCGAGTCCGCCTGCATCTGTCAT              |
|                                                          |           | NFYC10_F_BamHI       | ATGGATCCATGGTGTCTGTCAAAGAA              |
|                                                          |           | NFYC10_R_PstI        | ATCTGCAGTCAGCCTGCATCTGTCAT              |
|                                                          |           | NFYC10_F_NotI        | ATGCGGCCGCTATGGTGTCTGTCAAAGAA           |
|                                                          |           | NFYC10_R_NotI        | ATGCGGCCGCTCAGCCTGCATCTGTCAT            |
| <i>DPB3-1</i> promoter                                   | At1g07980 | NFYC10p_F_SacI       | GCGAGCTCTTAGGGAGAAGAAGATCCAACAAC        |
|                                                          |           | NFYC10p_R_PstI       | GCCTGCAGTAATTTTTTAGAACTACAGTATGTTTCACCC |
| <i>DREB2A</i>                                            | At5g05410 | DREB2A_F_SpeI        | CGACTAGTATGGCAGTTTATGATCAGAGTG          |
|                                                          |           | DREB2A_R_ClaI        | CGATCGATTAAGTTCTCCAGATCCAAG             |
|                                                          |           | DREB2A_F_EcoRI       | GGGGAATTCATGGCAGTTTATGATC               |
|                                                          |           | DREB2A205_R_PstI     | GGGCTGCAGCTAAAACTCGCTCAGCCA             |
|                                                          |           | DREB2A135_R_PstI     | TTTCTGCAGCTAAGGGAAATTAAGACGAGCC         |
|                                                          |           | DREB2A165_R_PstI     | TTTCTGCAGCTACTCTGTTTTACATGAACAC         |
|                                                          |           | DREB2A180_R_PstI     | GGGCTGCAGCTACGGCTCCACTCCACC             |
|                                                          |           | DREB2A136_F_EcoRI    | GGGGAATTCCGGTCTGATGCGTCTGAG             |
|                                                          |           | DREB2A77_R_PstI      | ATCTGCAGACATCGGCTATTCTCTGGTCTCC         |
|                                                          |           | DREB2A78_F_EcoRI     | GCGAATTCAGTTTCAGAGGAGTTAGGCAAAGGA       |
| <i>NF-YC1</i>                                            | AT3G48590 | NFYC1_F_EcoRI        | GTGAATTCATGGATACCAACAACCAGCAA           |
|                                                          |           | NFYC1_R_ClaI         | ATAGCGATTAAACCTTGGCCGTCGAGAT            |
| <i>NF-YC2</i>                                            | AT1G56170 | NFYC2_F_EcoRI        | AGGAATTCATGGAGCAGTCAGAAGAGGG            |
|                                                          |           | NFYC2_R_XhoI         | GTCTCGAGTTAAGACTCATCAGGGTGTGTC          |
| <i>NF-YC3</i>                                            | AT1G54830 | NFYC3_F_EcoRI        | GCGAATTCATGGATCAACAAGGACAATC            |
|                                                          |           | NFYC3_R_XhoI         | ATCTCGAGCTAATTGTCAGGATCCTGCTGC          |
| <i>NF-YC4</i>                                            | AT5G63470 | NFYC4_F_ClaI         | GTATCGATGCATGGACAATAACAACAACAACAACC     |
|                                                          |           | NFYC4_R_XhoI         | ATCTCGAGTCAACCTTGGCTATCGAGATTACCAT      |
| <i>NF-YC5</i>                                            | AT5G50490 | NFYC5_F_EcoRI        | ATGAATTCATGGAGAACAACAACAACAACCACCAACAGC |
|                                                          |           | NFYC5_R_XhoI         | ATCTCGAGTTAATTCACCGTTTCTCCATTTGC        |
| <i>NF-YC6</i>                                            | AT5G50480 | NFYC6_F_EcoRI        | ATGAATTCATGGCTGAGAACAACAACAACAACGG      |

# Supplemental Data. Sato et al. (2014). Plant Cell 10.1105/tpc.114.132928

| Target gene                                              | LocusID   | Oligonucleotide name | Sequence (5' to 3')                 |
|----------------------------------------------------------|-----------|----------------------|-------------------------------------|
| Primers used for cloning of coding or promoter sequences |           |                      |                                     |
| <i>NF-YC6</i>                                            | AT5G50480 | NFYC6_R_XhoI         | ATCTCGAGTCAATTTCCGCCGCCGTTTCCTC     |
| <i>NF-YC7</i>                                            | AT5G50470 | NFYC7_F_EcoRI        | GCGAATTCATGGAAGAGAACAACGGCAAC       |
|                                                          |           | NFYC7_R_XhoI         | ATCTCGAGTCAATTACCGCCGCTGCTTC        |
| <i>NF-YC8</i>                                            | AT5G27910 | NFYC8_F_EcoRI        | GTGAATTCATGGAGAACAACAACGGCA         |
|                                                          |           | NFYC8_R_XhoI         | ATCTCGAGTTAGTTTCCGTCGTCACCTCC       |
| <i>NF-YC9</i>                                            | AT1G08970 | NFYC9_F_EcoRI        | ATGAATTCATGGATCAACAAGACCATGGACAG    |
|                                                          |           | NFYC9_R_XhoI         | ATCTCGAGCTAATTTTCTGGTCAGGTTGG       |
| <i>NC2a1</i>                                             | AT3G12480 | NFYC11_F_EcoRI       | CCGAATTCATGAGGAAGAAGCTCGATAC        |
|                                                          |           | NFYC11_R_XhoI        | CGCTCGAGTTAGCCTTCTTCGTGATAATC       |
|                                                          |           | NFYC11_F_SmaI        | ATCCCGGGAAATGAGGAAGAAGCTCGATACTCGGT |
|                                                          |           | NFYC11_R_XhoI_2      | CGCTCGAGTAAGCCTTCTTCGTGATAATC       |
|                                                          |           | NFYC11_F_Sall        | ATGTCGACATGAGGAAGAAGCTCGATACTCGGT   |
| <i>NF-YC12</i>                                           | AT5G38140 | NFYC12_F_EcoRI       | CTGAATTCATGAGGAGGCCAAAGTCATC        |
|                                                          |           | NFYC12_R_XhoI        | ATCTCGAGTCACTGGAGATCACAGTTGAGG      |
|                                                          |           | NFYC12_F_SmaI        | ATCCCGGGTAATGAGGAGGCCAAAGTCATC      |
|                                                          |           | NFYC12_R_XhoI_2      | GCCTCGAGTAACTGGAGATCACAGTTGAGG      |
|                                                          |           | NFYC12_F_Sall        | ATGTCGACATGAGGAGGCCAAAGTCATC        |
| <i>DPB3-2</i>                                            | AT5G43250 | NFYC13_F_EcoRI       | CGBAATTCATGGAGGAAGAAGAAGGAT         |
|                                                          |           | NFYC13_R_XhoI        | ATCTCGAGTTAGGCTGAATCAGTCTTTGCT      |
|                                                          |           | NFYC13_F_BamHI       | GCGGATCCTATGGAGGAAGAAGAAGGAT        |
|                                                          |           | NFYC13_R_XhoI_2      | ATCTCGAGTAAGGCTGAATCAGTCTTTGCT      |
|                                                          |           | NFYC13_F_BamHI_2     | GCGGATCCATGGAGGAAGAAGAAGGAT         |
| <i>NC2a2</i>                                             | AT5G19490 | NFYC14_F_SmaI        | ATCCCGGGTATGAAGAAGAAGCTCCAGACACGTT  |
|                                                          |           | NFYC14_R_XhoI        | CCCTCGAGTCACTCTTGGTCTATGCTTTCTTC    |
| <i>NF-YB1</i>                                            | AT2G38880 | NFYB1_F_BamHI        | ATGGATCCATATGGCGGATACGCCTTCG        |
|                                                          |           | NFYB1_R_XhoI         | ATCTCGAGTTACCAGCTCGGCATTTCTTCACC    |
|                                                          |           | NFYB1_F_XbaI         | ATTCTAGACATGGCGGATACGCCTTCG         |
|                                                          |           | NFYB1_R_XhoI_2       | ATCTCGAGTAACCAGCTCGGCATTTCTTCACC    |
|                                                          |           | NFYB1_F_XbaI_2       | ATTCTAGAATGGCGGATACGCCTTCG          |
| <i>NF-YB2</i>                                            | AT2G47810 | NFYB2_F_ClaI         | CGATCGATATATGGGGGATTCCGACAGG        |
|                                                          |           | NFYB2_R_XhoI         | ATCTCGAGTTAAGTCCTTGTCTACCGGAGGC     |
|                                                          |           | NFYB2_F_XbaI         | CGTCTAGAGATGGGGGATTCCGACAGG         |
|                                                          |           | NFYB2_R_XhoI_2       | ATCTCGAGTAAAGTCCTTGTCTACCGGAGGC     |

Supplemental Data. Sato et al. (2014). Plant Cell 10.1105/tpc.114.132928

|                                                          |           | NFYB2_F_XbaI_2       | CGTCTAGAATGGGGGATTCCGACAGG          |
|----------------------------------------------------------|-----------|----------------------|-------------------------------------|
| Target gene                                              | LocusID   | Oligonucleotide name | Sequence (5' to 3')                 |
| Primers used for cloning of coding or promoter sequences |           |                      |                                     |
| <i>NF-YB3</i>                                            | AT1G09030 | NFYB3_F_ClaI         | ATATCGATACATGGCGGATTCGGACAACG       |
|                                                          |           | NFYB3_R_XhoI         | CGCTCGAGTTAAGAAAAATGATGGGAA         |
|                                                          |           | NFYB3_F_XbaI         | ATTCTAGAGATGGCGGATTCGGACAACG        |
|                                                          |           | NFYB3_R_XhoI_2       | CGCTCGAGTAAAGAAAAATGATGGGAA         |
|                                                          |           | NFYB3_F_XbaI_2       | ATTCTAGAATGGCGGATTCGGACAACG         |
| <i>NF-YB4</i>                                            | AT2G37060 | NFYB4_F_ClaI         | CGATCGATGCATGACAGACGAAGATAGATTG     |
|                                                          |           | NFYB4_R_XhoI         | ATCTCGAGTCAACGGGCCGAGGAGC           |
| <i>NF-YB5</i>                                            | AT2G13570 | NFYB5_F_ClaI         | CGATCGATACATGGCGGGGAATTATCAT        |
|                                                          |           | NFYB5_R_XhoI         | CGCTCGAGTTAATTATCTGGCGAGGATTTAG     |
|                                                          |           | NFYB5_F_XbaI         | GCTCTAGAGATGGCGGGGAATTATCAT         |
| <i>NF-YB6</i>                                            | AT3G53340 | NFYB6_F_ClaI         | ATATCGATACATGGAACGTGGAGGCTTC        |
|                                                          |           | NFYB6_R_XhoI         | CGCTCGAGTCAGTACTTATGTTGTTGAGTCG     |
|                                                          |           | NFYB6_F_XbaI         | ATTCTAGAGATGGCAGAGGGCAGTATGCGTC     |
|                                                          |           | NFYB6_R_XhoI_2       | CGCTCGAGTAAGTACTTATGTTGTTGAGTCG     |
|                                                          |           | NFYB6_F_XbaI_2       | ATTCTAGAATGGCAGAGGGCAGTATGCGTC      |
| <i>NF-YB7</i>                                            | AT5G47670 | NFYB7_F_ClaI         | ATATCGATACATGACTGAGGAGAGCCCAGAAGAAG |
|                                                          |           | NFYB7_R_XhoI         | CGCTCGAGTCACCACTGAATTGAATCAATGT     |
|                                                          |           | NFYB7_F_XbaI         | ATTCTAGAGATGACTGAGGAGAGCCCAGAAGAAG  |
|                                                          |           | NFYB7_R_XhoI_2       | CGCTCGAGTAACCACTGAATTGAATCAATGT     |
|                                                          |           | NFYB7_F_XbaI_2       | ATTCTAGAATGACTGAGGAGAGCCCAGAAGAAG   |
| <i>NF-YB8</i>                                            | AT5G47640 | NFYB8_F_ClaI         | ATATCGATACATGGCGGAGTCGCAGG          |
|                                                          |           | NFYB8_R_XhoI         | ATCTCGAGCTAGTCTGTTCCCGGCATTG        |
| <i>NF-YB9</i>                                            | AT1G21970 | NFYB9_F_ClaI         | ATATCGATATATGGAACGTGGAGCTCCCTTC     |
|                                                          |           | NFYB9_R_XhoI         | CGCTCGAGTCACTTATACTGACCATAAT        |
|                                                          |           | NFYB9_F_XbaI         | GCTCTAGAGATGACCAGCTCAGTCGTA         |
| <i>NF-YB10</i>                                           | AT4G14540 | NFYB10_F_BamHI       | CGGGATCCATATGGCCGAATCGCAAAC         |
|                                                          |           | NFYB10_R_XhoI        | ATCTCGAGCTACTCTGTGCCCGGCATTGA       |
| <i>DPB4</i>                                              | AT5G23090 | NFYB11_F_ClaI        | GCATCGATACATGGAGTCGGAGAAAAGTGG      |
|                                                          |           | NFYB11_R_XhoI        | CGCTCGAGTCATTCATCTTCTTCATCACTC      |
|                                                          |           | NFYB11_F_XbaI        | GCTCTAGAGATGGAGTCGGAGAAAAGTGG       |
|                                                          |           | NFYB11_R_XhoI_2      | CGCTCGAGTCCTTCATCTTCTTCATCACTC      |
|                                                          |           | NFYB11_F_XbaI_2      | GCTCTAGAATGGAGTCGGAGAAAAGTGG        |

Supplemental Data. Sato et al. (2014). Plant Cell 10.1105/tpc.114.132928

| <i>NC2β1</i>                                             | AT5G08190 | NFYB12_F_EcoRI       | GCGAATTCATGGATCCGATGGATATAGTTGG     |
|----------------------------------------------------------|-----------|----------------------|-------------------------------------|
|                                                          |           | NFYB12_R_ClaI        | GCATCGATTTAGCTTTGTAGACTTGTTTGTG     |
| Target gene                                              | LocusID   | Oligonucleotide name | Sequence (5' to 3')                 |
| Primers used for cloning of coding or promoter sequences |           |                      |                                     |
| <i>NC2β2</i>                                             | AT2G27470 | NFYB13_F_ClaI        | GCATCGATACATGGATCCAATGGATATAGTCG    |
|                                                          |           | NFYB13_R_XhoI        | ATCTCGAGTTAGCTTTGCGGACTTCTCTGGTC    |
| <i>NF-YA1</i>                                            | AT5G12840 | NFYA1_F_SmaI         | ATCCCGGGTATGCAATCAAAACCGGGAAGAG     |
|                                                          |           | NFYA1_R_Sall         | ATGTCGACTTATGGTGCACCAGAAGAATTCAGGG  |
|                                                          |           | NFYA1_F_XbaI         | GCTCTAGAGATGCAATCAAAACCGGGAAGAG     |
|                                                          |           | NFYA1_R_XhoI         | ATCTCGAGTTATGGTGCACCAGAAGAATTCAGGG  |
| <i>NF-YA2</i>                                            | AT3G05690 | NFYA2_F_SmaI         | ATCCCGGGTATGGCTATGCAAACTGTGAGA      |
|                                                          |           | NFYA2_R_Sall         | ATGTCGACTCAGGTTTTGAAATTGCAGCAG      |
|                                                          |           | NFYA2_F_XbaI         | GCTCTAGAGATGGCTATGCAAACTGTGAGA      |
|                                                          |           | NFYA2_R_XhoI         | ATCTCGAGTCAGGTTTTGAAATTGCAGCAG      |
|                                                          |           | NFYA2_F_XbaI_2       | ATTCTAGAATGGCTATGCAAACTGTGAGA       |
|                                                          |           | NFYA2_R_XhoI_2       | ATCTCGAGTCCGGTTTTGAAATTGCAGCAG      |
| <i>NF-YA3</i>                                            | AT1G72830 | NFYA3_F_SmaI         | ATCCCGGGTATGATGCATCAGATGTTGA        |
|                                                          |           | NFYA3_R_Sall         | GCGTCGACTCAGATATGGACAGAGAAATGG      |
| <i>NF-YA4</i>                                            | AT2G34720 | NFYA4_F_BamHI        | GCGGATCCGTATGACTTCTTCAGTACATGA      |
|                                                          |           | NFYA4_R_PstI         | GCCTGCAGTCAAGATCTACCATTAGGACCAG     |
|                                                          |           | NFYA4_F_XbaI         | GCTCTAGAGATGACTTCTTCAGTACATGA       |
|                                                          |           | NFYA4_R_XhoI         | ATCTCGAGTCAAGATCTACCATTAGGACCAG     |
| <i>NF-YA5</i>                                            | AT1G54160 | NFYA5_F_BamHI        | GCGGATCCGTATGCAAGTGTTCCAAAGGA       |
|                                                          |           | NFYA5_R_PstI         | GCCTGCAGTCAAGTCCCTGACATGAGA         |
| <i>NF-YA6</i>                                            | AT3G14020 | NFYA6_F_BamHI        | GCGGATCCGTATGCAAGAGTTCATAGTAGC      |
|                                                          |           | NFYA6_R_PstI         | GCCTGCAGTCACATGAGGACTGAGACATGG      |
| <i>NF-YA7</i>                                            | AT1G30500 | NFYA7_F_BamHI        | GCGGATCCGTATGACTTCTTCAATCCATGA      |
|                                                          |           | NFYA7_R_PstI         | GCCTGCAGTCAAGATGTACCACTAGAAGCAG     |
|                                                          |           | NFYA7_F_XbaI         | GCTCTAGAGATGACTTCTTCAATCCATGA       |
|                                                          |           | NFYA7_R_XhoI         | ATCTCGAGTCAAGATGTACCACTAGAAGCAG     |
| <i>NF-YA8</i>                                            | AT1G17590 | NFYA8_F_BamHI        | GCGGATCCGCATGGATAAGAAAGTTTCACTTACTA |
|                                                          |           | NFYA8_R_PstI         | GCCTGCAGTCAGATATGGACAGAGAAATGG      |
| <i>NF-YA9</i>                                            | AT3G20910 | NFYA9_F_SmaI         | ATCCCGGGTATGGGAATTGAAGACATGC        |
|                                                          |           | NFYA9_R_Sall         | GCGTCGACTCATTTAATGGCTAGACGAGCTT     |
| <i>NF-YA10</i>                                           | AT5G06510 | NFYA10_F_SmaI        | ATCCCGGGTATGCAAACTGAGGAGCTTTTGTGCGC |

# Supplemental Data. Sato et al. (2014). Plant Cell 10.1105/tpc.114.132928

|                                                          |           | NFYA10_R_Sall          | CGTCGACTCATATATTAAGTTTGCAGCAGCCA             |
|----------------------------------------------------------|-----------|------------------------|----------------------------------------------|
| NF-YA2 promoter                                          | AT3G05690 | NFYA2p_F_PstI          | GCCTGCAGGTTTCTGAAGCTCGTTAGTCG                |
|                                                          |           | NFYA2p_R_XhoI          | ATCTCGAGCTCCAAATTCCAATTACAAAAAGTG            |
| Target gene                                              | LocusID   | Oligonucleotide name   | Sequence (5' to 3')                          |
| Primers used for cloning of coding or promoter sequences |           |                        |                                              |
| NF-YB3 promoter                                          | AT1G09030 | NFYB3p_F_PstI          | GCCTGCAGACTCTCAAAAATCGCCAAGAT                |
|                                                          |           | NFYB3p_R_XhoI          | GCCTCGAGCTTTAGATCGAGGAGACAAAAGGT             |
| HsfA3 promoter                                           | At5g03720 | HsfA3p_F_SpeI          | GCACTAGTAAACAATGTGAGGGATA                    |
|                                                          |           | HsfA3p_R_PstI          | GGGCTGCAGTTGATATAGTAGAAAA                    |
|                                                          |           | HsfA3p1_F_SacI         | GGGGAGCTCTGGACTATAAACCAACAGAAA               |
|                                                          |           | HsfA3p2_F_SacI         | TTTGAGCTCATAGTCAACTATTTTTGCCTTCGC            |
|                                                          |           | HsfA3p3_F_SacI         | TTTGAGCTCTGAAAAAGGAAACACGAAAAGCG             |
|                                                          |           | HsfA3p4_F_SacI         | GGGGAGCTCTACTTCCTTCCCTAAACCT                 |
|                                                          |           | HsfA3p3M_F             | AGTGAGAGAGAGAGTGAGAAAAAAGGTGTGTGTGATAATTAGGG |
| RD29A promoter                                           | At5g52310 | RD29Ap_F_XbaI          | CCCTCTAGACATTTAATCTGAGTCC                    |
|                                                          |           | RD29Ap_R_PstI          | GGGCTGCAGTTTCCAAAGATTTTTT                    |
| Primers used for genotyping of T-DNA insertion mutant    |           |                        |                                              |
| DPB3-1                                                   | At1g07980 | NFYC10_F_XbaI          | Described above                              |
|                                                          |           | NFYC10_R_XhoI          | Described above                              |
| DREB2A                                                   | At5g05410 | dreb2a-1_F             | GCTTCTTGAGCAGTAGGGAAAGTA                     |
|                                                          |           | dreb2a-1_R             | CGAAAAAGCTACACACAAGAAGAA                     |
| T-DNA                                                    |           | SALK_LBb1.3            | ATTTTGCCGATTTCGGAAC                          |
|                                                          |           | GABI_o8409             | ATATTGACCATCATACTCATTGC                      |
| Primers used for qRT-PCR                                 |           |                        |                                              |
| Hsp17.A-CI                                               | At1g59860 | Hsp17.A-CI_RT-PCR_F    | CTGGGTCTTGACTTTGTGTGTG                       |
|                                                          |           | Hsp17.A-CI_RT-PCR_R    | TGTCACACAAGTTACTAGCTTCCA                     |
| HsfA2                                                    | At2g26150 | HsfA2_RT-PCR_F         | TGGGATTCTCATAAGTTCTCAACA                     |
|                                                          |           | HsfA2_RT-PCR_R         | TGGATCAATCTTTCTGAATCCAT                      |
| HsfA7A                                                   | At3g51910 | HsfA7A_RT-PCR_F        | GCTCTAGAATGATGAACCCGTTTCTCCCG                |
|                                                          |           | HsfA7A_RT-PCR_R        | TCCCCCGGGTTAGGAGGTGGAAGCCAAAC                |
| HsfA7B                                                   | At3g63350 | HsfA7B_RT-PCR_F        | AGCAGATTTTCGAGCAGAAGAGA                      |
|                                                          |           | HsfA7B_RT-PCR_R        | TGCTCCACCTCTTCCATTTTGAT                      |
| HsfA3                                                    | At5g03720 | HsfA3_RT-PCR_F         | TTCGCTAACGAGGCTTTCC                          |
|                                                          |           | HsfA3_RT-PCR_R         | CCTCAGTAGGTGACCCTT                           |
| HsfA3promoter                                            | At5g03720 | HsfA3promoter_RT-PCR_F | GAGAGCTAAGTGAAGCTGCAAGGA                     |

# Supplemental Data. Sato et al. (2014). Plant Cell 10.1105/tpc.114.132928

|                           |           | HsfA3promoter_RT-PCR_R | TCGTCATCATGTTCCATTGATT     |
|---------------------------|-----------|------------------------|----------------------------|
| <i>GSTU20</i>             | At1g78370 | GSTU20_RT-PCR_F        | CACACACTCGCTTGTTTCACG      |
|                           |           | GSTU20_RT-PCR_R        | TCGCCATTGCTATAGGATCTC      |
| <i>DPB3-1</i>             | At1g07980 | NF-YC10_RT-PCR_F       | GTCAACAAAGCCACGGAGAT       |
| Target gene               | LocusID   | Oligonucleotide name   | Sequence (5' to 3')        |
| Primers used for qRT-PCR  |           |                        |                            |
| <i>DPB3-1</i>             | At1g07980 | NF-YC10_RT-PCR_R       | ATGCCTCTTTCCCATTCCTC       |
| <i>At4g36010</i>          | At4g36010 | At4g36010_RT-PCR_F     | CTTGTGGCGGAGCTGATTAC       |
|                           |           | At4g36010_RT-PCR_R     | CCTTCGTTGCACTCTTCACA       |
| <i>DREB2A</i>             | At5g05410 | DREB2A_RT-PCR_F        | CAGTGTGCCAACGGTTCAT        |
|                           |           | DREB2A_RT-PCR_R        | AAACGGAGGTATTCCGTAGTTGAG   |
| <i>RD29A</i>              | At5g52310 | RD29A_RT-PCR_F         | TGGATCTGAAGAACGAATCTGATATC |
|                           |           | RD29A_RT-PCR_R         | GGTCTTCCCTTCGCCAGAA        |
| <i>RD29B</i>              | At5g52300 | RD29B_RT-PCR_F         | GGAGAGAGCAGAGAGGCTCA       |
|                           |           | RD29B_RT-PCR_R         | CCGTTGACCACCGAGATAGT       |
| <i>18S rRNA</i>           |           | 18S rRNA_RT-PCR_F      | AAACGGCTACCACATCCAAG       |
|                           |           | 18S rRNA_RT-PCR_R      | CCTCCAATGGATCCTCGTTA       |
| <i>NF-YB1</i>             | AT2G38880 | NFYB1_RT-PCR_F         | AGTGATTAAGAACAATCGCCAAA    |
|                           |           | NFYB1_RT-PCR_R         | CACTGATCTCTAATTTCCTATGC    |
| <i>NF-YB2</i>             | AT2G47810 | NFYB2_RT-PCR_F         | TATCATGTGATAGAACGAACATTGG  |
|                           |           | NFYB2_RT-PCR_R         | TTTACACAGCCTCAAAATCTAAACC  |
| <i>NF-YB3</i>             | AT1G09030 | NFYB3_RT-PCR_F         | GGAGACAAGGCATAAGGAAG       |
|                           |           | NFYB3_RT-PCR_R         | GATGTCCCATCGTAGTCACCA      |
| <i>NF-YB6</i>             | AT3G53340 | NFYB6_RT-PCR_F         | AAGTTTAAGCGAAAACAATGCTG    |
|                           |           | NFYB6_RT-PCR_R         | CCACAAGACAGATCAGATGAAAA    |
| <i>NF-YB7</i>             | AT5G47670 | NFYB7_RT-PCR_F         | CTCTCATCATCATCCTTCTCCAT    |
|                           |           | NFYB7_RT-PCR_R         | GCAATGATTTAGGAGAGAAAGCA    |
| <i>DPB4</i>               | AT5G23090 | NFYB11_RT-PCR_F        | GGATCTTCATCCACTACCTCTCC    |
|                           |           | NFYB11_RT-PCR_R        | CCTTAAACACATCATCAGCCTTC    |
| <i>NF-YA2</i>             | AT3G05690 | NFYA2_RT-PCR_F         | CCGAGATGGCTTCTTAACAA       |
|                           |           | NFYA2_RT-PCR_R         | GAAAGATATGTTACAGATGGAGTG   |
| Primers used for ChIP-PCR |           |                        |                            |
| <i>HsfA3</i>              | At5g03720 | HsfA3promoter_RT-PCR_F | Described above            |
|                           |           | HsfA3promoter_RT-PCR_R | Described above            |
| <i>At1g75860</i>          | At1g75860 | At1g75860_ChIP_F       | CGGACCGAGCCAGTAGTCGTC      |

# Supplemental Data. Sato et al. (2014). Plant Cell 10.1105/tpc.114.132928

|                                          |           |                   |                                     |
|------------------------------------------|-----------|-------------------|-------------------------------------|
|                                          |           | At1g75860_ChIP_R  | GGGGGAGAAGATAGCTAAGCGCG             |
| <i>HsfA2</i>                             | At2g26150 | HsfA2_ChIP_F      | AGAGAAAAATTGTGCAGCAGGT              |
|                                          |           | HsfA2_ChIP_R      | CGCCAGAAAAAGCCTACTAAAA              |
| <i>18S rDNA</i>                          |           | 18S rRNA_RT-PCR_F | Described above                     |
|                                          |           | 18S rRNA_RT-PCR_R | Described above                     |
| Primers used for construction of vectors |           |                   |                                     |
|                                          |           | Myc-N/SpeI        | AAACTAGTTATGGAACAGAAGCTTATTTTCAGAGG |
|                                          |           | Myc-C/XbaI        | AAATCTAGAAGATCCTCCTCTGAAATAAGCTTCTG |
|                                          |           | 3xFlag-N/SpeI     | AAACTAGTTATGGACTACAAAGACCATGACGG    |
|                                          |           | 3xFlag-C/XbaI     | AAATCTAGACCCCTTGTCATCGTCATCCTTGT    |
|                                          |           | StrepII-N/SpeI    | AAACTAGTTATGTGGTCTCATCCTCAATTCGAG   |
|                                          |           | StrepII-C/XbaI    | AAATCTAGACCCCTTCTCGAATTGAGGATGAGACC |
